1 **Full title:**

2 **Downregulation of hippocampal *NR2A/2B* subunits related to cognitive impairment in**  
3 **a pristane-induced lupus *BALB/c* mice**

4

5 **Short title:**

6 **Cognitive impairment in a pristane model of lupus**

7

8 Jonatan Luciano-Jaramillo<sup>1¶</sup>, Flavio Sandoval-García<sup>1,¶</sup>, Mónica Vázquez-Del Mercado<sup>1,2\*</sup>,  
9 Yanet Karina Gutiérrez-Mercado<sup>3</sup>, Rosa Elena Navarro-Hernández<sup>1</sup>, Erika Aurora Martínez-  
10 García<sup>1</sup>, Oscar Pizano-Martínez<sup>1</sup>, Fernanda Isadora Corona-Meraz<sup>1</sup>, Jacinto Bañuelos-  
11 Pineda<sup>4</sup>, Jorge Floresvillar-Mosqueda<sup>5</sup>, Beatriz Teresita Martín-Márquez<sup>1\*</sup>.

12

- 13 1. Universidad de Guadalajara, Centro Universitario de Ciencias de la Salud, Instituto  
14 de Investigación en Reumatología y del Sistema Músculo Esquelético (IIRSME),  
15 Guadalajara, Jalisco, CP 44340, México.
- 16 2. Hospital Civil de Guadalajara “Dr. Juan I. Menchaca”, División de Medicina Interna,  
17 Servicio de Reumatología, CONACyT PNPC, Guadalajara, Jalisco, CP 44340,  
18 México.
- 19 3. Unidad de Evaluación Preclínica, Biotecnología Médica y Farmacéutica, CONACYT  
20 Centro de Investigación y Asistencia en Tecnología y Diseño del Estado de Jalisco  
21 (CIATEJ), Guadalajara, CP 44270, México.
- 22 4. Universidad de Guadalajara, Centro Universitario de Ciencias Biológicas y  
23 Agropecuarias, Departamento de Medicina Veterinaria, Zapopan, Jalisco, CP 45110,  
24 México.

25 5. Colegio Once de México, San Juan de Ocotán, Jalisco, CP 45019, México.

26

27 \*Corresponding authors

28 E-mail: [bethymar@hotmail.com](mailto:bethymar@hotmail.com) (BTMM); [dravme@hotmail.com](mailto:dravme@hotmail.com) (MVM)

29

30 ¶ These authors contributed equally to this work.

31

32

33

34

35

36

37

38

39

40

41

42

43

44 **Abstract:**

45 Neuropsychiatric systemic lupus erythematosus (NPSLE) is a severe complication associated  
46 with the neurotoxic effects of circulating autoantibodies in the central nervous system (CNS)  
47 manifested frequently as a learning and memory deficit. Pristane-induced lupus in *BALB/c*  
48 female mice is an experimental model that resembles some clinical and immunological SLE  
49 pathogenesis associated with environmental factors. Nevertheless, there is no experimental  
50 evidence that relate pristane-induced lupus with cognitive dysfunction associated with  
51 autoantibodies production.

52 **Objective:**

53 To evaluate cognitive impairment related to memory deficits in a pristane-induced lupus  
54 *BALB/c* female mice related to mRNA expression levels of *NR2A/2B* hippocampal subunits  
55 in short and long-term memory task at 7 and 12 weeks after LPS exposition (7wLPS and  
56 12wLPS) in a behavioral test with the employment of Barnes maze.

57 **Methods:**

58 Fifty-four female *BALB/c* mice of 8-12 weeks old were included in 2 experimental groups: 7  
59 and 12 weeks after lipopolissacharide (LPS) exposure and classified in subgroups (control,  
60 pristane and pristane+LPS). To determine cognitive dysfunction, mice were tested in a  
61 Barnes maze. Serum anti-Sm antibodies and relative expression of hippocampal *NR2A/NR2B*  
62 subunits were quantified.

63 **Results:** Pristane and pristane+LPS mice showed a prolonged escape latency at 7wLPS than  
64 at 12wLPS in short-term memory. Downregulation of hippocampal *NR2A* subunit was more  
65 evident than *NR2B* in pristane and pristane+LPS at 7wLPS and 12wLPS. The anti-Sm  
66 autoantibodies levels correlate with the relative expression of *NR2A*.

67 **Conclusion:** Downregulation of hippocampal *NR2A/2B* subunits in the pristane-model of  
68 lupus in *BALB/c* mice may be related to anti-Sm autoantibodies production with the  
69 consequence of cognitive impairment in early stages of autoimmune disease.

70

71

72

73

74

75

76

77

78

79

80

81

82

83

## 84 **Introduction:**

85 Systemic lupus erythematosus (SLE) is an idiopathic autoimmune disorder characterized by  
86 induction of autoantibodies against intracellular components such as nucleosomes (double-  
87 stranded DNA and histones) and small nuclear ribonucleoproteins (snRNPs) known as Smith  
88 antigen (anti-Sm), that is consider for the American College of Rheumatology (ACR) as a  
89 classification criteria for SLE diagnosis [1]. This condition presents a wide variety of clinical  
90 manifestations with multiple organs affectations, especially skin and kidneys, however, the  
91 heart and nervous system are also damaged [2]. In SLE, central and peripheral nervous  
92 system are involved in the development of psychiatric abnormalities termed  
93 neuropsychiatric-SLE (NPSLE) syndromes [3]. In 1999, the ACR established a standard  
94 nomenclature with case definitions for 19 neuropsychiatric conditions, 12 related to central  
95 nervous system (CNS) manifestations (mainly seizures, headache, stroke, depression,  
96 cognitive dysfunction, and psychosis) [3, 4]. Clinical studies estimate an NPSLE prevalence  
97 in a range from 17 to 80%, these variations can be attributed to diagnostic criteria, patient  
98 selection and assessment methods for autoantibodies detections [3, 5-7]. The  
99 etiopathogenesis of NPSLE is still unknown, however, several studies suggest that the  
100 presence of autoantibodies against to N-methyl-D-aspartate (NMDA) receptors in serum and  
101 cerebrospinal fluid (CF), the production of intrathecal proinflammatory  
102 cytokines/chemokines and vasculitis are associated to neuropsychiatric manifestations such

103 as cognitive dysfunction [2, 3]. Analysis in SLE patients and murine model of lupus report  
104 that certain subsets of anti-double-stranded DNA (anti-dsDNA) and anti-NMDA transit from  
105 the vasculature to the amygdala when the blood-brain barrier (BBB) permeability was altered  
106 and cross-react with a consensus pentapeptide (DWEYS) present in NR2A and NR2B  
107 subunits of NMDA receptor, mediate neuronal loss and affects learning and memory [2, 8-  
108 10].

109 To reproduce clinical and molecular NPSLE physiopathology, there have been developed  
110 experimental models of lupus brain diseases, and to be consider a brain model and resemble  
111 the neuropathology condition, they must gather two requirements: the production of  
112 autoantibodies that cross-react with neuronal receptors and the disruption of BBB integrity  
113 by exposure to lipopolysaccharide (LPS) [2]. Lupus can be induced by exposure a healthy  
114 mouse strain (*BALB/c*) to hydrocarbon oils such as pristane (2,6,10,14-  
115 tetramethylpentadecane) that induce a wide range of specific SLE autoantibodies (anti-DNA,  
116 anti-RNP/Sm and anti-Su) in a range between 12 to 25 weeks in the trial period [11-13]. This  
117 is a suitable model to evaluate the break tolerance related to environmental factors associated  
118 with SLE development. Nevertheless, there are no experimental evidences that relate  
119 pristane-induce lupus with cognitive dysfunction associated with the development of  
120 autoantibodies against hippocampal NMDA receptor subunits NR2A/2B.

121 In order to evaluate cognitive impairment related to memory deficits in a pristane-induced  
122 lupus *BALB/c* mice, we analyzed the mRNA expression levels of *NR2A/2B* hippocampal  
123 subunits in short and long-term memory task at 7 and 12 weeks after LPS exposition with a  
124 behavioral test with the employment of Barnes maze.

125

126

127

128

## 129 **Materials and methods:**

### 130 **Animals:**

131 Female *BALB/c* mice of 8-12 weeks old were obtained from UNAM-Envigo RMS  
132 Laboratory in México City and housed in the animal facility of Instituto de Investigación en  
133 Reumatología y del Sistema Músculo Esquelético of Centro Universitario de Ciencias de la  
134 Salud under the following conditions: 2-4 animals in clear cages (7.6x11.6x4.8 inches),  
135 controlled temperature room at 22±1°C, positive laminar flow, 12 hours of light/dark cycles  
136 and feed *ad libitum* with purified water and normocaloric diet (Rodent Chow 5001,  
137 Purina™). The protocol was approved by the Committee of Investigation, Ethics and  
138 Biosecurity of Centro Universitario de Ciencias de la Salud of the University of Guadalajara  
139 (Protocol number CI-07918) and all experimental procedures were carried out in compliance  
140 with the Rules for Research in Health Matters (Official Mexican Norms NOM 0062-ZOO-  
141 1999 and NOM-033-ZOO-1995).

142

### 143 **Induction of lupus by pristane and LPS exposure**

144 A total of 54 female *BALB/c* mice of 8-12 weeks old were included and separated into 2  
145 experimental groups: 7 and 12 weeks after LPS exposure (abbreviated as 7wLPS and  
146 12wLPS respectively), and in a subgroups denominated control (single intraperitoneal

147 injection (i.p.) of 0.5 mL NaCl 0.9%), pristane (single i.p. pristane injection, Sigma Chemical  
148 Co, St Louis, MO, USA) and pristane+LPS (single i.p. pristane injection and LPS of *E. coli*  
149 O55:B5, Sigma St Louis, MO, USA in a dose of 3mg/kg diluted in NaCl 0.9% 16 weeks  
150 post-pristane administration [14]). The 7wLPS group were integrated by 8 controls, 10  
151 pristane, and 10 pristane+LPS and for 12wLPS group we included 6 controls, 10 pristane and  
152 10 pristane+LPS (Fig 1, A).

153

154 **Fig 1. Experimental procedures squeme and Barnes maze.** A) Time schedule of  
155 experimental procedures. B) Barnes maze platform designed for mouse behavioral testing.

156

### 157 **Barnes maze:**

158 To assess memory and learning process to determine cognitive dysfunction, experimental  
159 groups of 7wLPS and 12wLPS were evaluated in a behavioral test with a Barnes maze  
160 adapted for mouse based on the protocol described by Barnes *et al* [15]. For the maze, we  
161 employed a circular black acrylic platform of 36.8 inches of diameter anchored in a metallic  
162 base of 32 inches of height above the floor. The platform has 20 holes of 2 inches of diameter  
163 disposed along the perimeter with 3.2 inches among them (19 empty holes and one scape  
164 hole with dark box). For reference points to reach the escape hole, we used extra-maze cues  
165 around the room (circle, rhombus, triangle, and square in different colors) and for eliminating  
166 odor cues, the experimentator cleaned the platform and the scape box in every trial with ethyl  
167 alcohol at 70% (Fig 1, B). To record the cognitive performance, we used a video tracking  
168 system (Pro Webcam-C920 HD 1080p).

169



170 **Behavioral test:**

171 The behavioral tests were developed by an experimentator in three phases: habituation,  
172 acquisition and probe trial assessed in an airy and odor free white room without visual and  
173 sound distractors. The habituation consisted in two days (Day 0 and Day 0') with two trials  
174 per mouse into the platform and escape hole for a lapse of 180 seconds. For the acquisition  
175 phase (Day 1 and Day 1') we included two trials per mouse and consisted in place the mouse  
176 into a white acrylic cylindrical chamber in the middle of the platform for 10 seconds and then  
177 released it to explore the platform for a lapse of 180 seconds, finishing the trial when the  
178 mouse entered by itself into the escape hole. In this phase, if the mouse did not enter in the  
179 target hole, it can be guided by the experimentator. The probe trials were assessed to evaluate  
180 memory and learning consolidation in mice that conformed subgroups and consisted in three  
181 repetitions per mouse on the maze to reach the escape hole for 180 seconds, taking in account  
182 all the procedures described previously. This phase was denominated Short Time Memory  
183 (STM) and consisted of four probe trials (D1-D4). Once finished, mice were preserved for a  
184 lapse of 48 hours and then evaluated for the Long Time Memory (LTM) at Day 7. We  
185 considered to evaluate the behavioral performance with two parameters: the latency in  
186 seconds to reach and enter in the escape box and the errors established as the deflections of  
187 the head in empty holes for each mouse prior to find and enter in escape box (Fig 1A).

188

189 **Anti-Sm antibody ELISA:**

190 Once the behavioral tests were finished, we obtained total blood from the tail vein of each  
191 mouse, the serum was separated and stored at -20°C. Levels of mouse anti-Sm antibodies in  
192 sera from experimental groups were measured by enzyme-linked immunosorbent assay

193 (ELISA) using the quantitative kit Mouse Anti-Sm Ig's (total/A+G+M) (Alpha Diagnostic  
194 International™) in a 1:2 dilution based on reference standards provided by the manufacturer.

195

196

### 197 **RNA isolation and *NR2A/2B* subunits qRT-PCR analysis:**

198 Once finished the behavioral test, mice were euthanized by CO<sub>2</sub> inhalation and after  
199 craniotomy surgery, the hippocampus region was removed to obtain lysates for total RNA  
200 isolation. This procedure was performed according to the manufacturer's procedure using the  
201 GF-1 Total RNA extraction kit (Vivantis Technologies™). The complementary DNA  
202 synthesis (cDNA) was performed with 5µg of each total RNA sample using a reaction size  
203 of 20µL with oligo (dT) primer (100 ng/µL), RNase free, DEPC treated water and Moloney  
204 Murine Leukemia Virus Reverse Transcriptase (M-MLV RT) kit (Applied Biosystems, 850  
205 Lincoln Centre Drive, Foster City, CA 94404) and store at -20°C until being used for  
206 expression analysis. Real-time quantitative polymerase chain reaction (qRT-PCR) was  
207 conducted using Rotor-Gen (Q5 PLEX HRM System, Qiagen™) and the Q-Rex software  
208 was used for the analysis. A threshold cycle (C<sub>T</sub>) value was determined from each  
209 amplification plot. For *Mus musculus* genes, the specific primers were synthesized based in  
210 sequences published by Hamada *et al.*[16] as follows: *GluN2A* forward 5'-  
211 CCTTTGTGGAGACAGGAATCA-3' and reverse 5'-AGAGGCGCTGAAGGGTTC-3';  
212 *GluN2B* forward 5'-GGGTTACAACCGGTGCCTA-3' and reverse 5'-  
213 CTTTGCCGATGGTGAAAGAT-3'. Expression of target genes was normalized with the  
214 endogenous reference mouse gene *GAPDH* using the following primers: forward 5'-  
215 TGTCCGTCGTGGATCTGAC-3' and reverse 5'-CCTGCTTCACCACCTTCTTG-3'. The

216 qPCR was performed in a final reaction volume of 10 $\mu$ L (10 $\mu$ M forward and reverse primer,  
217 25 $\mu$ M ROX, 2x SYBR Green qPCR master mix and 100ng cDNA). The conditions of  
218 reaction were: holding at 95°C/10 min, cycling at 35 cycles of 95°C/10s and 55°C/15s and  
219 melt curve at 95°C/15s, 72°C/60s, and 95°C/15s.

## 220 **Statistical analysis:**

221 Comparisons were made using Kruskal-Wallis, post hoc tests were carried out using Mann-  
222 Whitney U as applicable. Values are presented as median with percentile 25 and 75 (P<sub>25</sub>-P<sub>75</sub>)  
223 and as mean and standard error of median ( $\pm$ SEM), as applicable. Spearman's correlations  
224 coefficients were also calculated. All data were analyzed using SPSS v22.0 (SPSS Inc.  
225 Chicago, IL) and GraphPad Prism version 6.00 for Windows (GraphPad Software, La Jolla,  
226 CA).  $P < 0.05$  was considered statistically significant.

227

228

229

230

231

232

233

234

235

236

237

238

239

## 240 **Results:**

### 241 **Pristane and pristane+LPS treated mice showed a prolonged escape** 242 **latency in STM at 7wLPS**

243 Once the mice completed the habituation and acquisition probes in Barnes maze, we  
244 evaluated the STM in control, pristane and pristane+LPS subgroups at 7wLPS during D1-D4  
245 (Fig 2). In D1, we observed differences in the exploration time to reach the target hole and  
246 enter in escape box between pristane 162.2s (120-180s) vs. pristane+LPS 180s (179.9-180s,  
247  $P=0.033$ ); in D2 control 97.3s (34.7-133.6s) vs. pristane+LPS (113-180s,  $P= 0.009$ ); in D3  
248 in control 22.1s (14.9-30.1s) vs. pristane 125s (33.3-180s,  $P= 0.014$ ) and control vs.  
249 pristane+LPS 145.6s (116.5-152.8s,  $P<0.0001$ ) and in D4 between control 12.2s (7.0-39.1s)  
250 vs. pristane+LPS 175s (40.3-180s,  $P=0.003$ ). We were able in this first test to distinguish a  
251 different behavioral pattern between control and subgroups of pristane-treated mice. In this  
252 point, it is important to highlight that the subgroup of pristane and pristane+LPS showed in  
253 D1 of the probe the same behavioral pattern than the control subgroup and as the test was  
254 progressed, the mice treated with pristane and pristane+LPS showed an erratic behavior  
255 observable in D3-D4 and attributable to deficient memory retention.

256

257 **Fig 2. Escape latency of experimental subgroups in STM at 7wLPS.** Total time average  
258 in seconds (s) of subgroups control, pristane and pristane+LPS to reach and enter to scape  
259 box during D1-D4 of STM. A) D1, B) D2, C) D3, D) D4. Values are presented as median  
260 with percentile 25 and 75 ( $P_{25}$ - $P_{75}$ ). \*  $P<0.05$ , \*\*  $P<0.01$ , \*\*\*\* $P<0.0001$ .

261 At the same time of STM evaluation, we calculated the number of errors between groups in  
262 D1-D4 (S1 Fig) and we observed differences only in D4 between control 0.5 (0-1) vs. pristane  
263 3 (2-6,  $P=0.04$ ).

264

265 **S1 Fig. Errors in STM at 7wLPS.** Total errors of subgroups in STM at 7wLPS. A) D1, B)  
266 D2, C) D3, D) D4. Values are presented as median with percentile 25 and 75 ( $P_{25}$ - $P_{75}$ ).  
267 \*\*  $P<0.01$ .

268

269 **Pristane and pristane+LPS treated mice showed a prolonged escape**  
270 **latency in STM at 12wLPS**

271 With the purpose to determine if the induction of lupus by pristane and the exposure LPS  
272 maintain its effects in cognition in a prolonged manner, we used the same experimental  
273 subgroups and evaluate them at 12wLPS (Fig 3). We observed statistical difference in escape  
274 latency only in D2 between control vs. pristane (141.5s vs. 180s,  $P=0.013$ ) and control vs.  
275 pristane+LPS (141.5s vs. 180s 171.5-180,  $P=0.013$ ) and although there were no differences  
276 in D1 and D3-D4, we observed that some mice of pristane and pristane+LPS subgroups  
277 showed prolonged escape latency in D3-D4.

278

279 **Fig 3. Escape latency of experimental subgroups in STM at 12wLPS.** Total time average  
280 in seconds (s) for each mouse to reach and enter to scape box during D1-D4 of STM at  
281 12wLPS. A) D1, B) D2, C) D3, D) D4. Values are presented as median with percentile 25  
282 and 75 (P<sub>25</sub>-P<sub>75</sub>). \**P* < 0.05, \*\**P*<0.01.

283

284 During the test, the errors were calculated and we did not observe differences between the  
285 subgroups during D1-D4 in STM at 12wLPS (S2 Fig).

286

287 **S2 Fig. STM errors at 12wLPS.** Total errors of subgroups at 12wLPS during D1-D4. A)  
288 D1, B) D2, C) D3, D) D4. Values are presented as median with percentile 25 and 75 (P<sub>25</sub>-  
289 P<sub>75</sub>).

290

291 **Pristane and pristane+LPS treated mice showed a prolonged scape latency**  
292 **in LTM at 7wLPS**

293 To determine learning and memory consolidation, we evaluated LTM 48 hours after STM  
294 test in 7wLPS subgroups and we observed a prolonged escape latency between control vs.  
295 pristane (6s vs. 14s, *P*=0.005) and control vs. pristane+LPS (6s vs. 35s, *P*<0.0001). In this  
296 probe, the total of control mice reaches the target hole in less than seconds in comparison to  
297 mice of pristane and pristane+LPS subgroups (Fig 4).

298

299 **Fig 4. Escape latency of experimental subgroups in LTM at 7wLPS.** Total time average  
300 in seconds (s) for each mouse to reach and enter to escape box during LTM at 7wLPS. A)

301 D1, B) D2, C) D3, D) D4. The data were shown in medians and percentile 25 and 75 ( $P_{25}$ -  
302  $P_{75}$ ). \*\* $P<0.01$ , \*\*\*\*  $P<0.0001$ .

303

304 In relation to the errors in this probe, we did not observe differences between subgroups (S3  
305 Fig).

306

307 **S3 Fig. LTM errors at 7wLPS.** Total errors of subgroups at 7wLPS in LTM probe. Values  
308 are presented as median with percentile 25 and 75 ( $P_{25}$ - $P_{75}$ ).

309

310 **Pristane and pristane+LPS showed a prolonged scape latency in LTM at**  
311 **12wLPS**

312 We evaluated the escape latency in LTM 12wLPS (Fig 5) and observed differences between  
313 control vs. pristane+LPS (11s vs. 140s,  $P=0.016$ ). In this probe, we detected the same  
314 behavioral pattern of control mice in relation to the LTM at 7wLPS, in comparison to pristane  
315 and pristane+LPS group.

316

317 **Fig 5. Escape latency of experimental subgroups in LTM at 12wLPS.** Total time average  
318 in seconds (s) for each mouse to reach and enter to escape box during LTM at 12wLPS. The  
319 data were shown in medians and percentile 25 and 75 ( $P_{25}$ - $P_{75}$ ). \*  $P<0.05$ .

320

321 During LTM at 12wLPS, we did not observe differences between subgroups in the number  
322 of errors committed (S4 Fig).

323

324 **S4 Fig. Errors in LTM at 12wLPS.** Total errors of subgroups at 12wLPS in LTM. Values  
325 are presented as median with percentile 25 and 75 ( $P_{25}$ - $P_{75}$ ).

326

327

328

329 **Pristane and pristane+LPS treated mice produce the highest levels of**  
330 **serum anti-Sm antibodies**

331 We quantified the serum levels of anti-Sm antibodies in experimental groups by ELISA at  
332 7wLPS and 12wLPS. The results were as follows: control group (n=10) 599.9 U/mL (504.9-  
333 652.7 U/mL), pristane (n=15) 1617.3 U/mL (1163-2095 U/mL) and pristane+LPS (n=15)  
334 1284.7 U/mL (736.6-2095 U/mL). We observed statistical differences between the control  
335 group vs. pristane ( $P<0.01$ ), control group vs. pristane+LPS ( $P<0.01$ ) but not between  
336 pristane vs. pristane+LPS ( $P=0.475$ ) (Fig 6, A). To avoid false positives, we calculated the  
337 positive index of experimental samples that may be expressed relative to the control values  
338 consider as non-immune samples following the manufacture's recommendations. For this  
339 purpose, we calculated the net optical density (OD) + 2 standard deviation (SD) of control  
340 samples for obtain the positive index (0.55) and divided each sample net OD by the positive  
341 index we obtained differences in the positive index between control vs. pristane (0.55 vs.  
342 1.21,  $P<0.01$ ) and control vs. pristane+LPS (0.55 vs. 1.3,  $P<0.01$ ) (Fig 6, B).

343

344 **Fig 6. Serum levels of anti-Sm autoantibodies and positive index.** A) Serum levels of anti-  
345 Sm in experimental subgroups. B) The positive index is shown in arbitrary units. Samples  
346 with a value  $\geq 1$  were consider positive.  $**P<0.01$ .



347

348 ***NR2A* subunit expression decrease in mice treated with pristane and**  
349 **pristane+LPS at 7wLPS and 12wLPS**

350 The expression analysis for hippocampal *NR2A* subunits of the NMDA receptor was  
351 evaluated at 7wLPS and 12wLPS (Fig 7). We were able to observe in the pristane group a  
352 slight decrease in the relative expression of *NR2A* subunit in 0.51 fold times vs. control group  
353 ( $P=0.051$ ) and in pristane+LPS a 0.97 fold times vs. control group ( $P=0.002$ ). Regarding  
354 12wLPS, we found differences in *NR2A* relative expression between pristane vs. control in a  
355 0.95 fold times ( $P=0.004$ ) and in pristane+LPS vs. control in a 0.87 fold times ( $P=0.004$ ). It  
356 is important to highlight that we did not observe differences in pristane and pristane+LPS  
357 groups at 7 wLPS ( $P=0.101$ ) and 12 wLPS ( $P=0.151$ ).

358

359 **Fig 7. *NR2A* subunit expression of the murine hippocampus at 7wLPS and 12wLPS.**

360 Relative expression units were shown in mean ( $\pm$ SEM). \*  $P<0.05$ , \*\*  $P<0.01$ .

361

362 ***NR2B* subunit expression are not affected than *NR2A* in mice treated with**  
363 **pristane and pristane+LPS at 7wLPS and 12wLPS**

364 Regarding *NR2B* subunit expression at 7wLPS (Fig 8), we observed in pristane a decrease in  
365 0.68 fold times vs. control ( $P=0.001$ ) and in pristane+LPS in 0.41 fold times vs. control group  
366 ( $P=0.004$ ). In the groups evaluated 12wLPS, we observed in pristane a decrease in 0.56 fold  
367 times vs. control ( $P=0.004$ ) and in pristane+LPS vs. control a 0.36 fold times ( $P=0.004$ ). We  
368 did not observe differences between pristane and pristane+LPS groups at 7wLPS ( $P=0.293$ )  
369 and 12wLPS ( $P=0.238$ ).

370

371 **Fig 8. *NR2B* subunit expression of the murine hippocampus at 7wLPS and 12wLPS.**

372 Relative expression units were shown in mean ( $\pm$ SEM). \*\* $P < 0.01$ , \*\*\* $P < 0.001$ .

373

374 ***NR2A* subunit expression is affected by anti-Sm antibodies levels in mice**  
375 **treated with pristane and pristane+LPS at 7wLPS and 12wLPS**

376 With the objective of obtain an association between anti-Sm antibodies levels and relative  
377 expression of *NR2A/2B* subunits in mice treated with pristane and pristane+LPS at 7wLPS  
378 and 12wLPS, we determine a coefficient correlation and obtained an inverse and negative  
379 correlation between anti-Sm antibodies and *NR2A* mRNA relative expression ( $r = -0.461$ ,  
380  $=0.009$ ; Fig 9, A). Instead, when we analyzed the *NR2B* subunit, we did not observe an  
381 association ( $r = -0.136$ ,  $P = 0.466$ ; Fig 9, B).

382

383 **Fig 9. Correlation between anti-Sm antibodies levels and *NR2A/2B* subunit expression.**

384 A) Anti-Sm levels/mRNA expression levels of *NR2A* B) Anti-Sm levels/mRNA expression  
385 levels of *NR2B*.  $r =$  Spearman's coefficient correlation.

386

387

388

389

390

391

392

393

## 394 **Discussion:**

395 NPSLE is considered a severe condition of SLE physiopathology and the cognitive  
396 dysfunction is the more frequent neuropsychiatric alteration with a 15-81% of prevalence  
397 [17]. Several studies have proposed that autoantibodies such as anti-dsDNA and anti-Sm  
398 produce a cross-reaction with neuronal receptors, attributing a potential pathogenic role in  
399 NPSLE [18-20]. One description of this hypothesis was published by Bluestein *et al.* in 1981  
400 where they demonstrated an increased immunoglobulin G (IgG) antineural activity in CSF  
401 in SLE patients with active CNS manifestations[21]. These results are in accordance with  
402 analysis performed by How *et al.* in 1985, who demonstrated an association between serum  
403 antineuronal autoantibodies and NPSLE manifestations[22].

404 To date, cognitive dysfunction in NPSLE is associated to the presence in serum and CSF of  
405 antiphospholipid antibodies and anti-NMDA receptor subunit NR2A/2B (anti-NR2A/2B)  
406 antibodies, in addition to disease activity, corticosteroid use, hypertension and chronic  
407 damage [3, 17, 23]. Due to the inherent limitations for analyzing the effects of autoantibodies  
408 in SLE patients brains, it has been developed murine models of lupus for reproducing and  
409 understand the molecular events involved in the induction of excitotoxic neuronal death  
410 associated to cognitive impairment in the hippocampal region observed in NPSLE [14]. In  
411 this study, we decided to explore the possible cognitive impairment in a murine model that  
412 resembles SLE pathogenesis induced by environmental factors with the employ of a

413 hydrocarbon oil pristane. The pristane stimulates in female *BALB/c* mouse the production of  
414 proinflammatory cytokines and autoantibodies such as anti-Sm, anti-dsDNA, and anti-  
415 U1RNP that in addition with LPS, can disrupt and cross the BBB, altering the permeability  
416 of CNS frontier[24]. This phenomenon has been shown in SLE patients through Magnetic  
417 Resonance Imaging (MRI) corroborating high levels of permeability of BBB in SLE patients,  
418 particularly in hippocampus region more than orbitofrontal, prefrontal, anterior putamen, and  
419 globus/thalamus region related to autoantibody production [25].

420 With the purpose to evaluate the learning and memory process in murine models, behavioral  
421 tests are used to assess hippocampal deterioration associated with neuropathologic  
422 alterations. The strategic test used to analyze cognitive performance in mice is the Barnes  
423 maze, that consists of an elevated circular platform with empty holes and one escape hole  
424 around the perimeter. This test takes into advantage the natural preference of rodents for the  
425 dark environment and is not influenced by hunger motivation [26]. In this protocol, we used  
426 the Barnes maze test in a pristane-lupus induced *BALB/c* mice in two groups: 7wLPS and  
427 12wLPS for STM and LTM divided into experimental subgroups established as a control,  
428 pristane, pristane+LPS. The Barnes maze protocol considers two basic parameters: the  
429 escape latency and errors evaluated in our study during STM (D1-D4) and LTM (D7) at  
430 7wLPS and 12wLPS. In the first probe trial, we observed significant differences in escape  
431 latency between pristane/pristane+LPS vs. control group at 7wLPS in STM D3-D4, and were  
432 maintained in LTM probe. The subgroup of control mice decrease in escape latency as  
433 expected, as consequence of memory consolidation and learning process observed in other  
434 studies[27]. Nevertheless, mice treated with pristane and pristane+LPS showed an erratic  
435 behavior and anxiety, that resulted in a prolonged time to reach and enter in to escape hole.  
436 At 12wLPS in STM, we did not observe in pristane and pristane+LPS subgroups the same

437 behavioral pattern that characterize the STM at 7wLPS, in this sense, the mice at 12wLPS  
438 showed a decrease in latency to reach the escape hole, evidencing a hippocampal  
439 compensatory process [28]. These results show that the pristane have the potential to induce  
440 an acute antibody exposure, that can disturb the BBB and, in presence of LPS, these effects  
441 can be potentiated in primary stages of the disease, leading for secondary stage the effect of  
442 inflammation mediated by T cells and microglial activation with the production of  
443 proinflammatory cytokines [29].

444 Regarding neuronal development and memory consolidation in rodents, studies confirm that  
445 the NR2A/B subunits of NMDA mediate certain forms of synaptic plasticity and learning.  
446 These receptors are differentially expressed over development with NR2B predominance in  
447 mouse brain until NR2A expression increases from the second postnatal week affected by  
448 learning and sensory experience[30]. Successful olfactory discrimination learning in rats is  
449 associated with an increase in the NR2A/2B ratio and have been proposed that the increase  
450 in NR2A stabilize memories [31] and are associated with the emotional behavior regulation  
451 in mice [32].

452 In our study, we quantify the hippocampal mRNA expression levels of *NR2A* and *NR2B* by  
453 qRT-PCR and we observed a marked downregulation in the relative expression of *NR2A*  
454 more than *NR2B* subunit in 7wLPS and 12wLPS and obtained an inverse and negative  
455 correlation between anti-Sm antibodies and *NR2A* mRNA relative expression. This  
456 differential effect can be explained by experimental *in vitro* and *in vivo* analysis that relates  
457 the presence of autoantibodies (such as anti-NMDA) that affects the *NR2A/2B* synthesis at  
458 the nanoscale level and alter the correct receptor function causing synaptic internalization,  
459 modifyng the electrical activity. These changes are associated with memory impairment and  
460 including the temporary rearrangement of the NR2A/NR2B subunits[33]. On the other hand

461 in relation to anti-Sm antibodies and neuronal receptors, it has been demonstrated that these  
462 autoantibodies can disrupt BBB and have a potential neurotoxic effect that is considered  
463 prognostic factor for acute confusional state (ACS) in SLE [19, 20], however, more evidence  
464 is needed to determine the presence and molecular effect of anti-Sm antibodies on *NR2A/2B*  
465 subunits receptors in murine lupus cognitive impairment.

466

## 467 **Conclusions:**

468 We conclude that the downregulation of *NR2A/2B* subunits in the pristane-model of lupus in  
469 female *BALB/c* mice can be related to anti-Sm autoantibodies production with cognitive  
470 impairment consequence in the early stages of autoimmune disease.

471

## 472 **Financial disclosure:**

473 Author(s) received no specific funding for this work.

474

## 475 **Competing interest:**

476 Author(s) have declared that no competing interests exist.

477

478

479

## 480 **Author Contributions:**

481 **Conceived and experiment designed:** Beatriz Teresita Martín-Márquez, Flavio Sandoval-  
482 García, Mónica Vázquez-Del Mercado, Yanet Karina Gutiérrez-Mercado and Erika Aurora  
483 Martínez-García.

484 **Performed the experiments:** Jonatan Luciano-Jaramillo, Yanet Karina Gutiérrez-Mercado,  
485 Rosa Elena Navarro-Hernández, Oscar Pizano-Martínez and Fernanda Isadora Corona-  
486 Meraz.

487 **Analyzed the data:** Jonatan Luciano-Jaramillo and Jacinto Bañuelos-Pineda.

488 **Funding acquisition:** Beatriz Teresita Martín-Márquez, Flavio Sandoval-García, Mónica  
489 Vázquez-Del Mercado and Jorge Floresvillar-Mosqueda.

490 **Wrote the paper:** Beatriz Teresita Martín-Márquez, Flavio Sandoval-García and Erika  
491 Aurora Martínez García.

492

493

## 494 **References:**

495 1. Mahler M. Sm peptides in differentiation of autoimmune diseases. *Adv Clin Chem.*  
496 2011;54:109-28.

497 2. Diamond B, Volpe BT. A model for lupus brain disease. *Immunol Rev.*  
498 2012;248(1):56-67.

499 3. Zardi EM, Taccone A, Marigliano B, Margiotta DP, Afeltra A. Neuropsychiatric  
500 systemic lupus erythematosus: tools for the diagnosis. *Autoimmun Rev.* 2014;13(8):831-9.

501 4. Sciascia S, Bertolaccini ML, Roccatello D, Khamashta MA, Sanna G. Autoantibodies  
502 involved in neuropsychiatric manifestations associated with systemic lupus erythematosus:  
503 a systematic review. *J Neurol.* 2014;261(9):1706-14.

504 5. Briani C, Lucchetta M, Ghirardello A, Toffanin E, Zampieri S, Ruggero S, et al.  
505 Neurolupus is associated with anti-ribosomal P protein antibodies: an inception cohort study.  
506 *J Autoimmun.* 2009;32(2):79-84.

- 507 6. Vivaldo JF, de Amorim JC, Julio PR, de Oliveira RJ, Appenzeller S. Definition of  
508 NPSLE: Does the ACR Nomenclature Still Hold? *Front Med (Lausanne)*. 2018;5:138.
- 509 7. Pikman R, Kivity S, Levy Y, Arango MT, Chapman J, Yonath H, et al.  
510 Neuropsychiatric SLE: from animal model to human. *Lupus*. 2017;26(5):470-7.
- 511 8. Aranow C, Diamond B, Mackay M. Glutamate receptor biology and its clinical  
512 significance in neuropsychiatric systemic lupus erythematosus. *Rheum Dis Clin North Am*.  
513 2010;36(1):187-201, x-xi.
- 514 9. DeGiorgio LA, Konstantinov KN, Lee SC, Hardin JA, Volpe BT, Diamond B. A  
515 subset of lupus anti-DNA antibodies cross-reacts with the NR2 glutamate receptor in  
516 systemic lupus erythematosus. *Nat Med*. 2001;7(11):1189-93.
- 517 10. Bosch X, Ramos-Casals M, Khamashta MA. The DWEYS peptide in systemic lupus  
518 erythematosus. *Trends Mol Med*. 2012;18(4):215-23.
- 519 11. Satoh M, Reeves WH. Induction of lupus-associated autoantibodies in BALB/c mice  
520 by intraperitoneal injection of pristane. *J Exp Med*. 1994;180(6):2341-6.
- 521 12. Freitas EC, de Oliveira MS, Monticielo OA. Pristane-induced lupus: considerations  
522 on this experimental model. *Clin Rheumatol*. 2017;36(11):2403-14.
- 523 13. Reeves WH, Lee PY, Weinstein JS, Satoh M, Lu L. Induction of autoimmunity by  
524 pristane and other naturally occurring hydrocarbons. *Trends Immunol*. 2009;30(9):455-64.
- 525 14. Vo A, Volpe BT, Tang CC, Schiffer WK, Kowal C, Huerta PT, et al. Regional brain  
526 metabolism in a murine systemic lupus erythematosus model. *J Cereb Blood Flow Metab*.  
527 2014;34(8):1315-20.
- 528 15. Barnes CA. Memory deficits associated with senescence: a neurophysiological and  
529 behavioral study in the rat. *J Comp Physiol Psychol*. 1979;93(1):74-104.



- 530 16. Hamada S, Ogawa I, Yamasaki M, Kiyama Y, Kassai H, Watabe AM, et al. The  
531 glutamate receptor GluN2 subunit regulates synaptic trafficking of AMPA receptors in the  
532 neonatal mouse brain. *Eur J Neurosci.* 2014;40(8):3136-46.
- 533 17. Duarte-Garcia A, Romero-Diaz J, Juarez S, Cicero-Casarrubias A, Fragoso-Loyo H,  
534 Nunez-Alvarez C, et al. Disease activity, autoantibodies, and inflammatory molecules in  
535 serum and cerebrospinal fluid of patients with Systemic Lupus Erythematosus and Cognitive  
536 Dysfunction. *PLoS One.* 2018;13(5):e0196487.
- 537 18. Faust TW, Chang EH, Kowal C, Berlin R, Gazaryan IG, Bertini E, et al. Neurotoxic  
538 lupus autoantibodies alter brain function through two distinct mechanisms. *Proc Natl Acad  
539 Sci U S A.* 2010;107(43):18569-74.
- 540 19. Hirohata S, Sakuma Y, Yanagida T, Yoshio T. Association of cerebrospinal fluid anti-  
541 Sm antibodies with acute confusional state in systemic lupus erythematosus. *Arthritis Res  
542 Ther.* 2014;16(5):450.
- 543 20. Hirohata S, Sakuma Y, Matsueda Y, Arinuma Y, Yanagida T. Role of serum  
544 autoantibodies in blood brain barrier damages in neuropsychiatric systemic lupus  
545 erythematosus. *Clin Exp Rheumatol.* 2018.
- 546 21. Bluestein HG, Williams GW, Steinberg AD. Cerebrospinal fluid antibodies to  
547 neuronal cells: association with neuropsychiatric manifestations of systemic lupus  
548 erythematosus. *Am J Med.* 1981;70(2):240-6.
- 549 22. How A, Dent PB, Liao SK, Denburg JA. Antineuronal antibodies in neuropsychiatric  
550 systemic lupus erythematosus. *Arthritis Rheum.* 1985;28(7):789-95.
- 551 23. Massardo L, Bravo-Zehnder M, Calderon J, Flores P, Padilla O, Aguirre JM, et al.  
552 Anti-N-methyl-D-aspartate receptor and anti-ribosomal-P autoantibodies contribute to  
553 cognitive dysfunction in systemic lupus erythematosus. *Lupus.* 2015;24(6):558-68.

- 554 24. Magro-Checa C, Kumar S, Ramiro S, Beart-van de Voorde LJ, Eikenboom J, Ronen  
555 I, et al. Are serum autoantibodies associated with brain changes in systemic lupus  
556 erythematosus? MRI data from the Leiden NP-SLE cohort. *Lupus*. 2019;28(1):94-103.
- 557 25. Chi JM, Mackay M, Hoang A, Cheng K, Aranow C, Ivanidze J, et al. Alterations in  
558 Blood-Brain Barrier Permeability in Patients with Systemic Lupus Erythematosus. *AJNR*  
559 *Am J Neuroradiol*. 2019;40(3):470-7.
- 560 26. O'Leary TP, Savoie V, Brown RE. Learning, memory and search strategies of inbred  
561 mouse strains with different visual abilities in the Barnes maze. *Behav Brain Res*.  
562 2011;216(2):531-42.
- 563 27. Gawel K, Gibula E, Marszalek-Grabska M, Filarowska J, Kotlinska JH. Assessment  
564 of spatial learning and memory in the Barnes maze task in rodents-methodological  
565 consideration. *Naunyn Schmiedebergs Arch Pharmacol*. 2019;392(1):1-18.
- 566 28. Uriarte M, Ogundele OM, Pardo J. Long-lasting training in the Barnes maze prompts  
567 hippocampal spinogenesis and habituation in rats. *Neuroreport*. 2017;28(6):307-12.
- 568 29. Mader S, Brimberg L, Diamond B. The Role of Brain-Reactive Autoantibodies in  
569 Brain Pathology and Cognitive Impairment. *Front Immunol*. 2017;8:1101.
- 570 30. Brigman JL, Feyder M, Saksida LM, Bussey TJ, Mishina M, Holmes A. Impaired  
571 discrimination learning in mice lacking the NMDA receptor NR2A subunit. *Learn Mem*.  
572 2008;15(2):50-4.
- 573 31. Quinlan EM, Lebel D, Brosh I, Barkai E. A molecular mechanism for stabilization of  
574 learning-induced synaptic modifications. *Neuron*. 2004;41(2):185-92.
- 575 32. Boyce-Rustay JM, Holmes A. Genetic inactivation of the NMDA receptor NR2A  
576 subunit has anxiolytic- and antidepressant-like effects in mice. *Neuropsychopharmacology*.  
577 2006;31(11):2405-14.

578 33. Ladepeche L, Planaguma J, Thakur S, Suarez I, Hara M, Borbely JS, et al. NMDA  
579 Receptor Autoantibodies in Autoimmune Encephalitis Cause a Subunit-Specific Nanoscale  
580 Redistribution of NMDA Receptors. Cell Rep. 2018;23(13):3759-68.  
581

A)

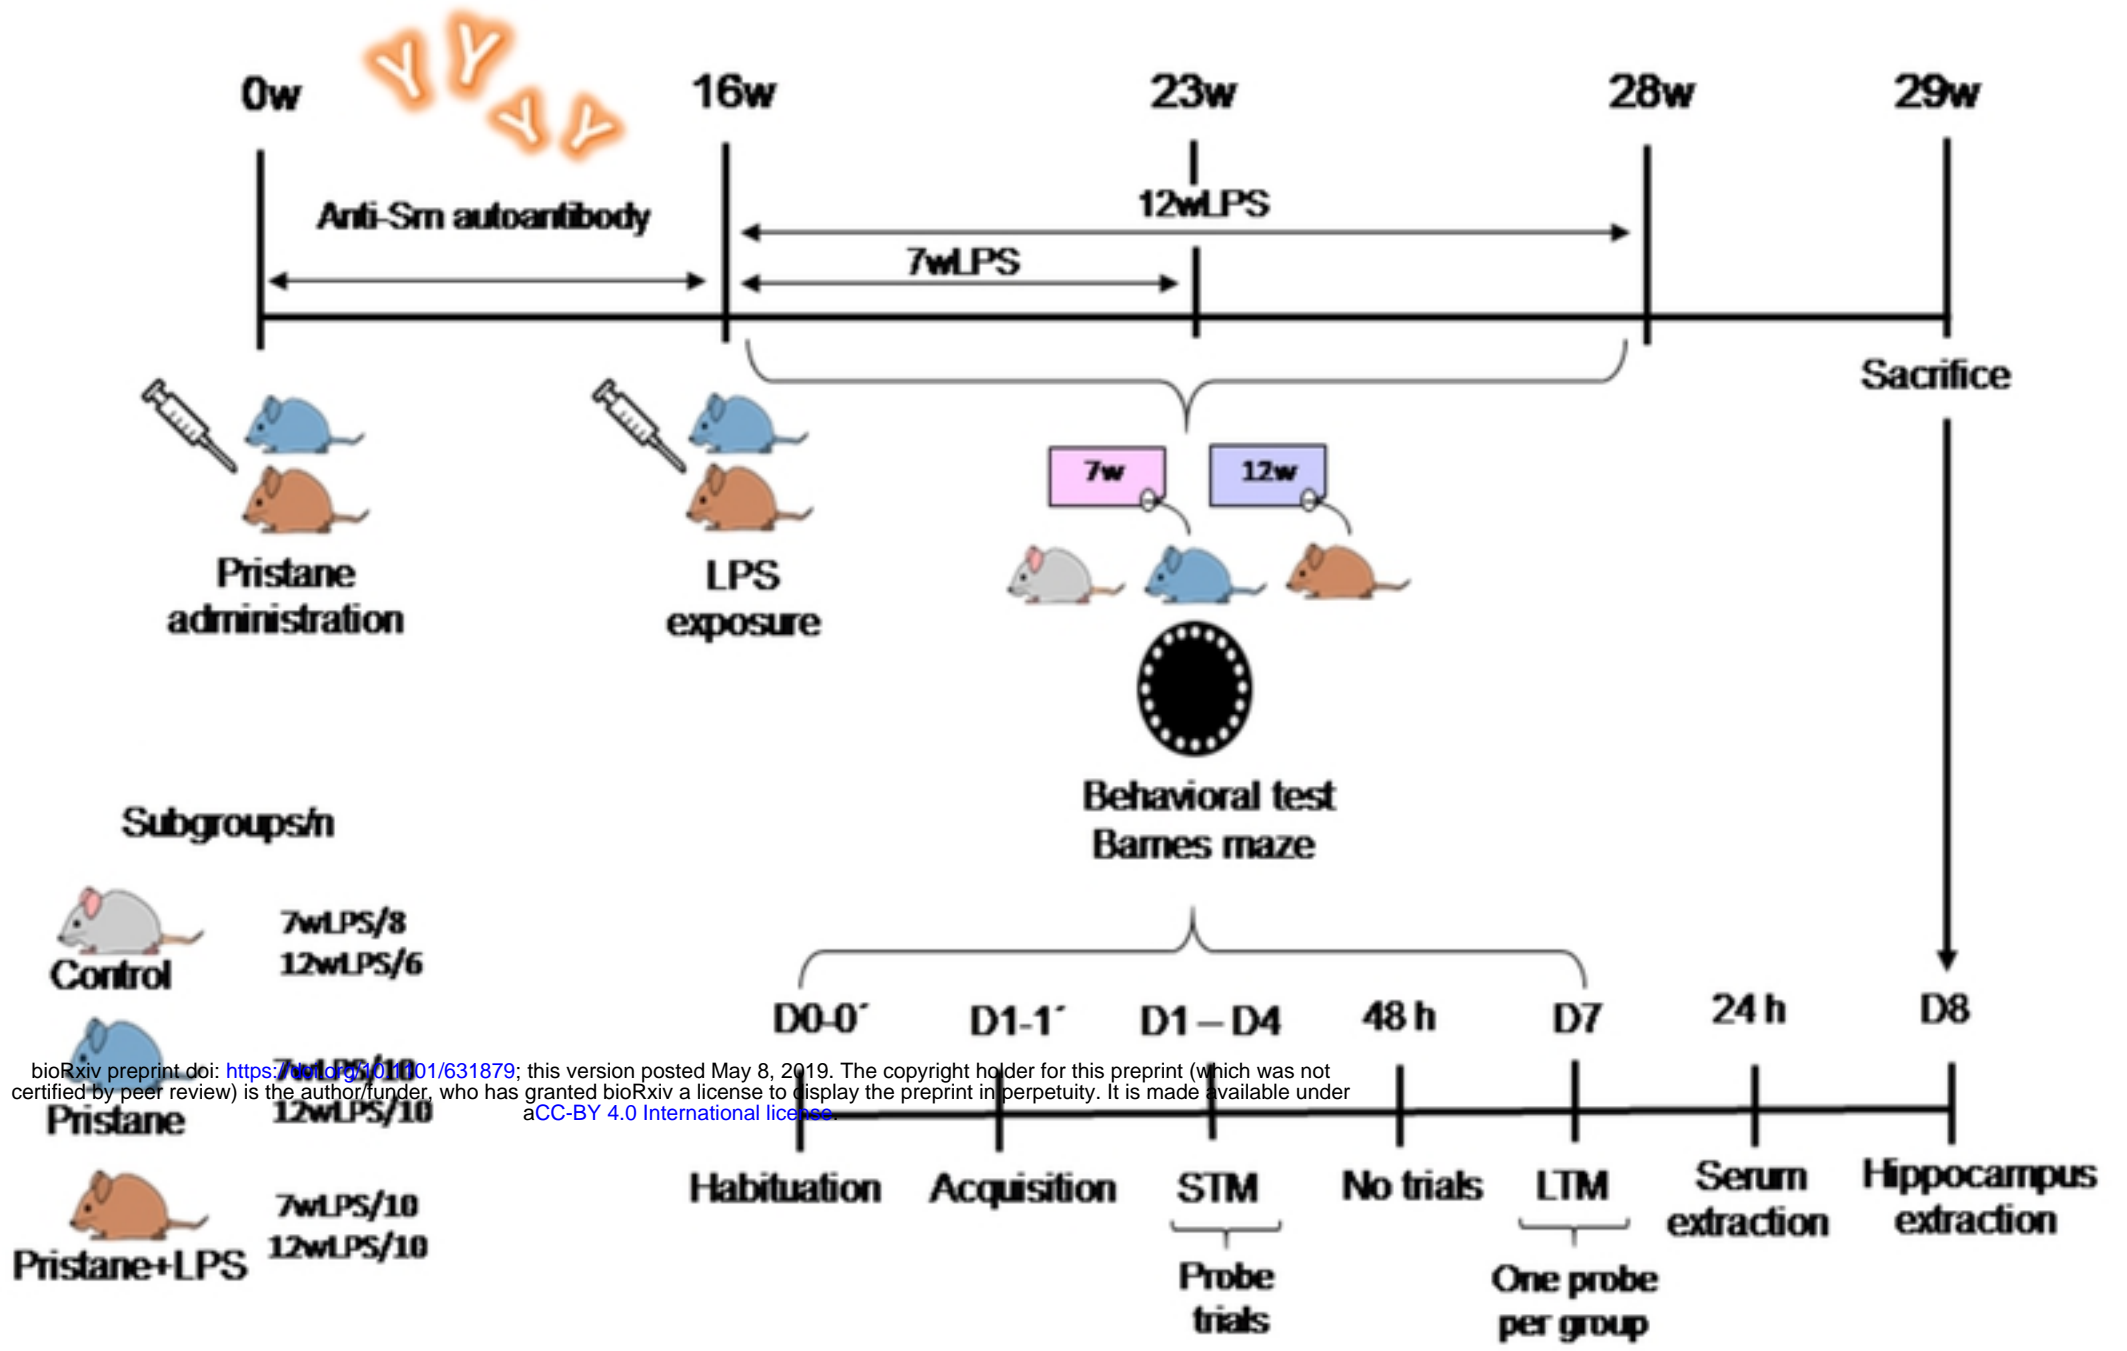

B)

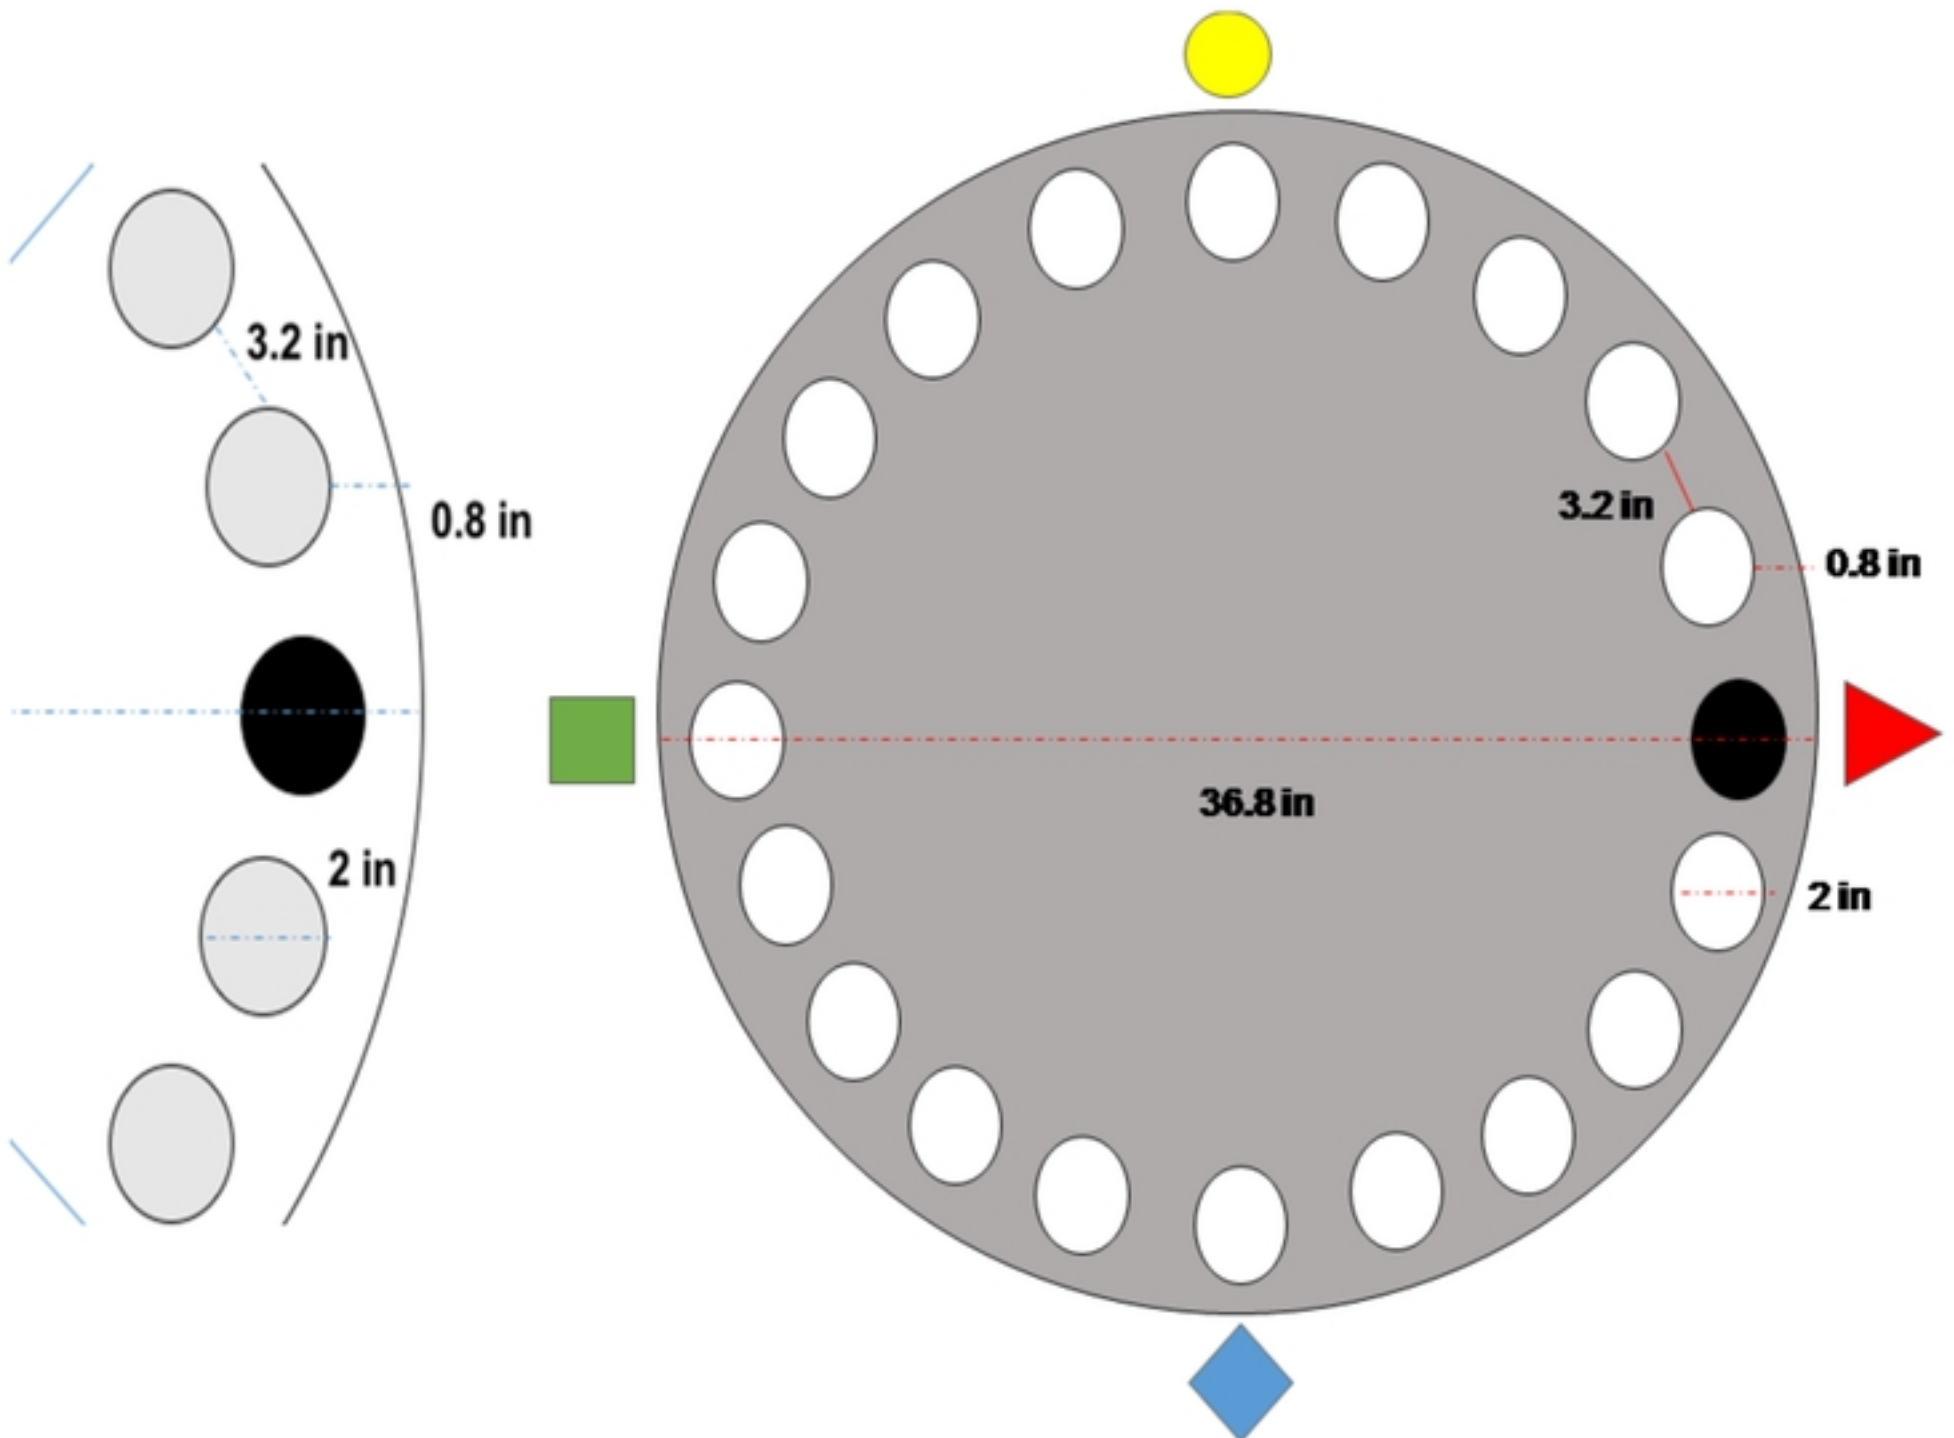

Fig 1

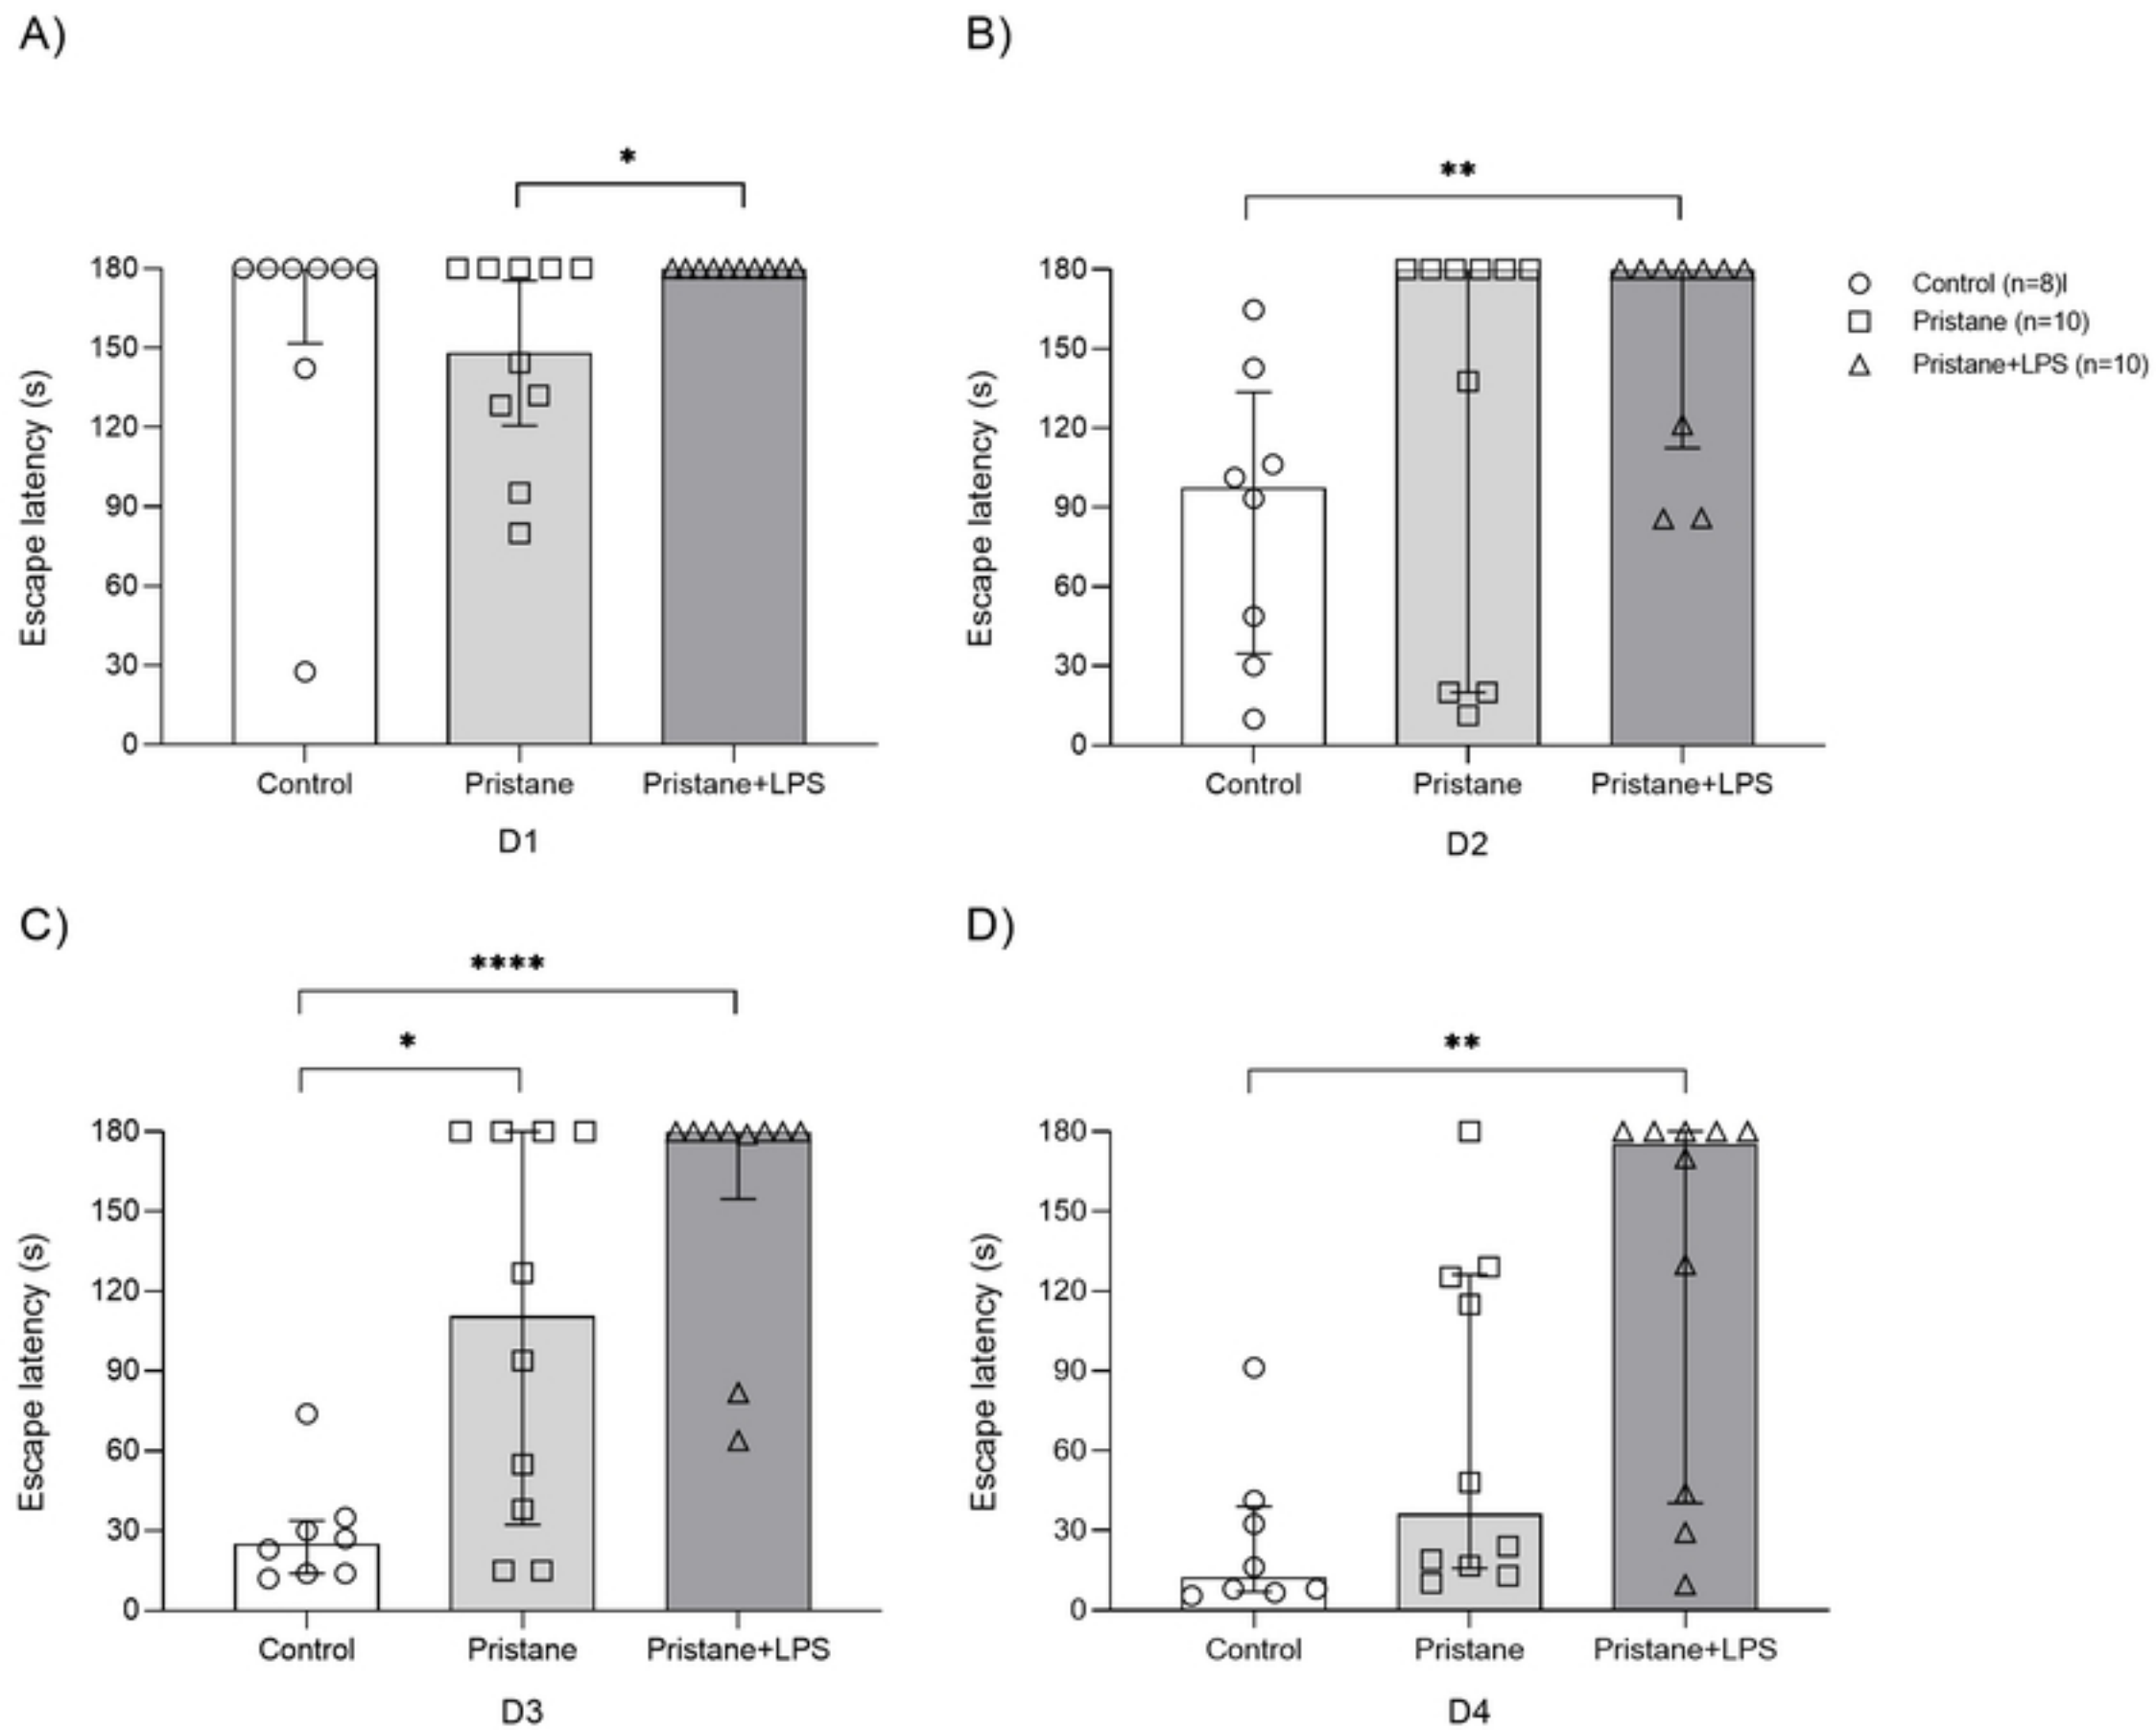

Fig 2

A)

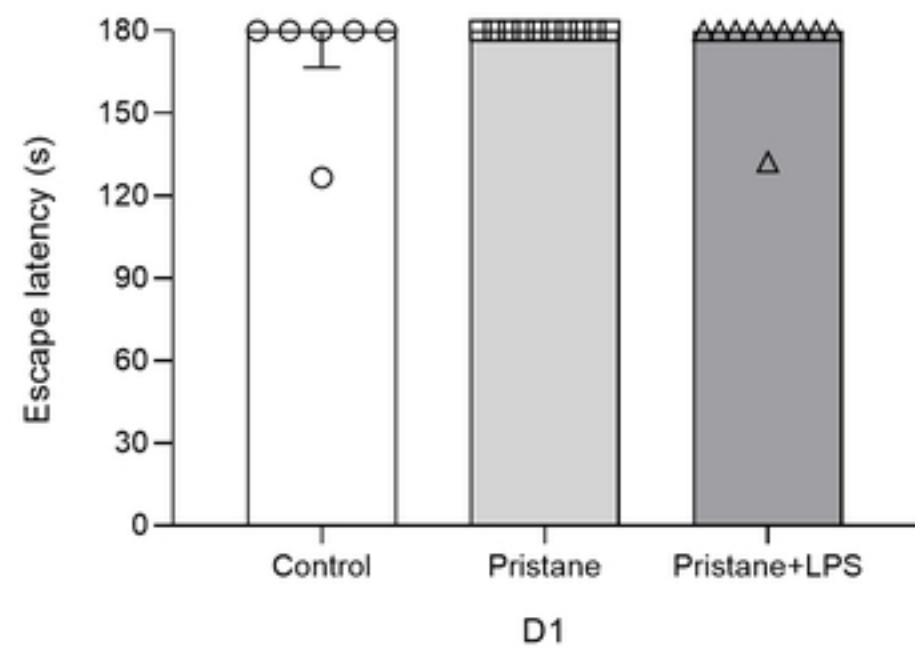

B)

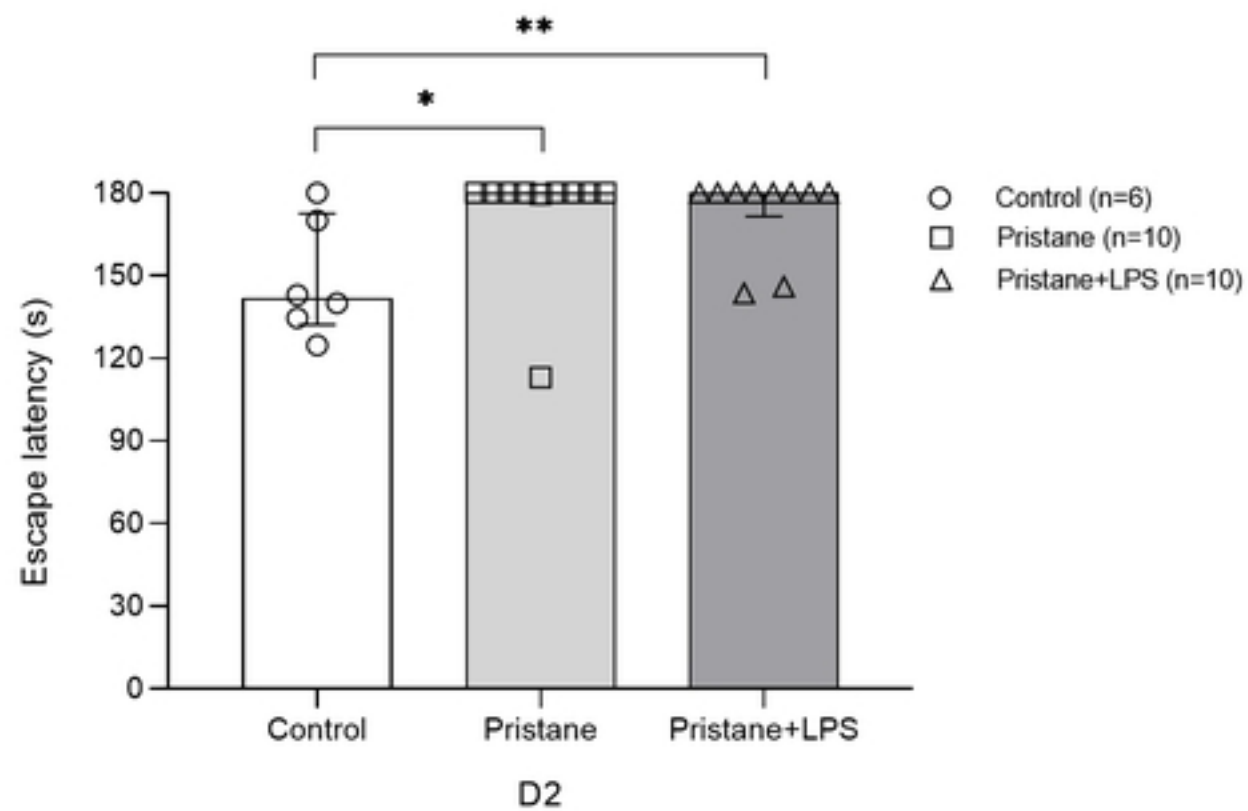

C)

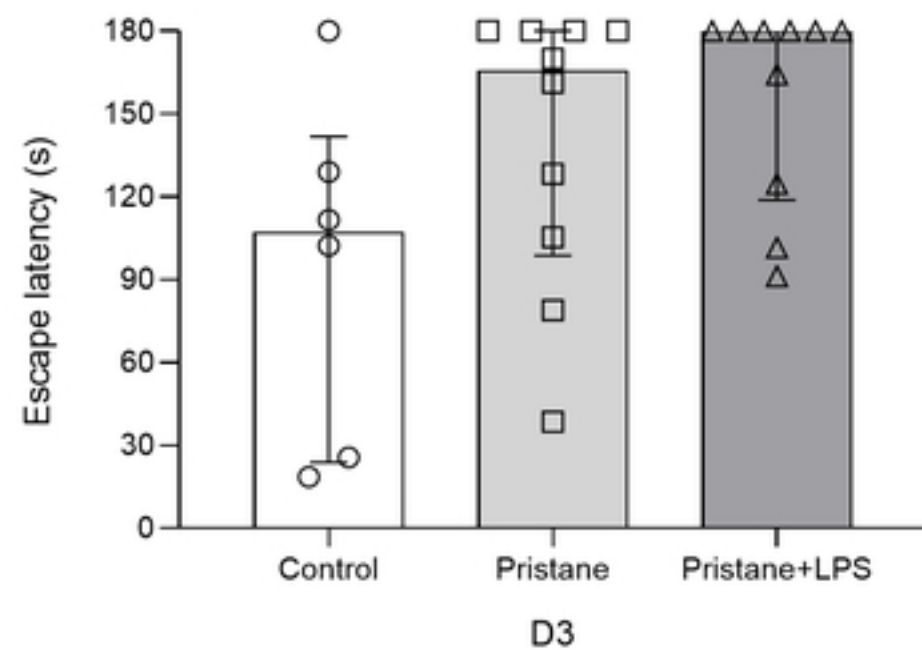

D)

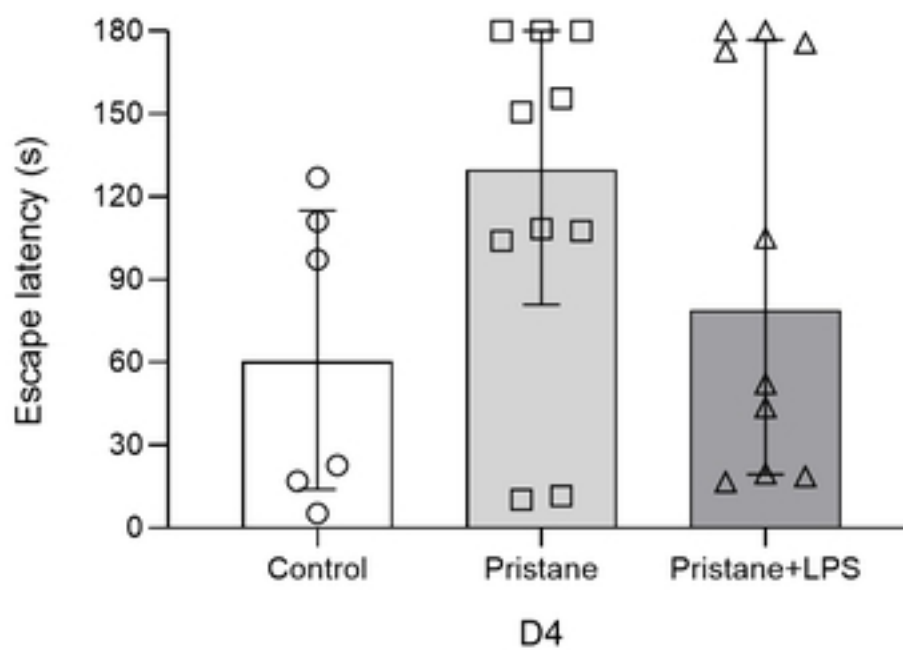

Fig 3

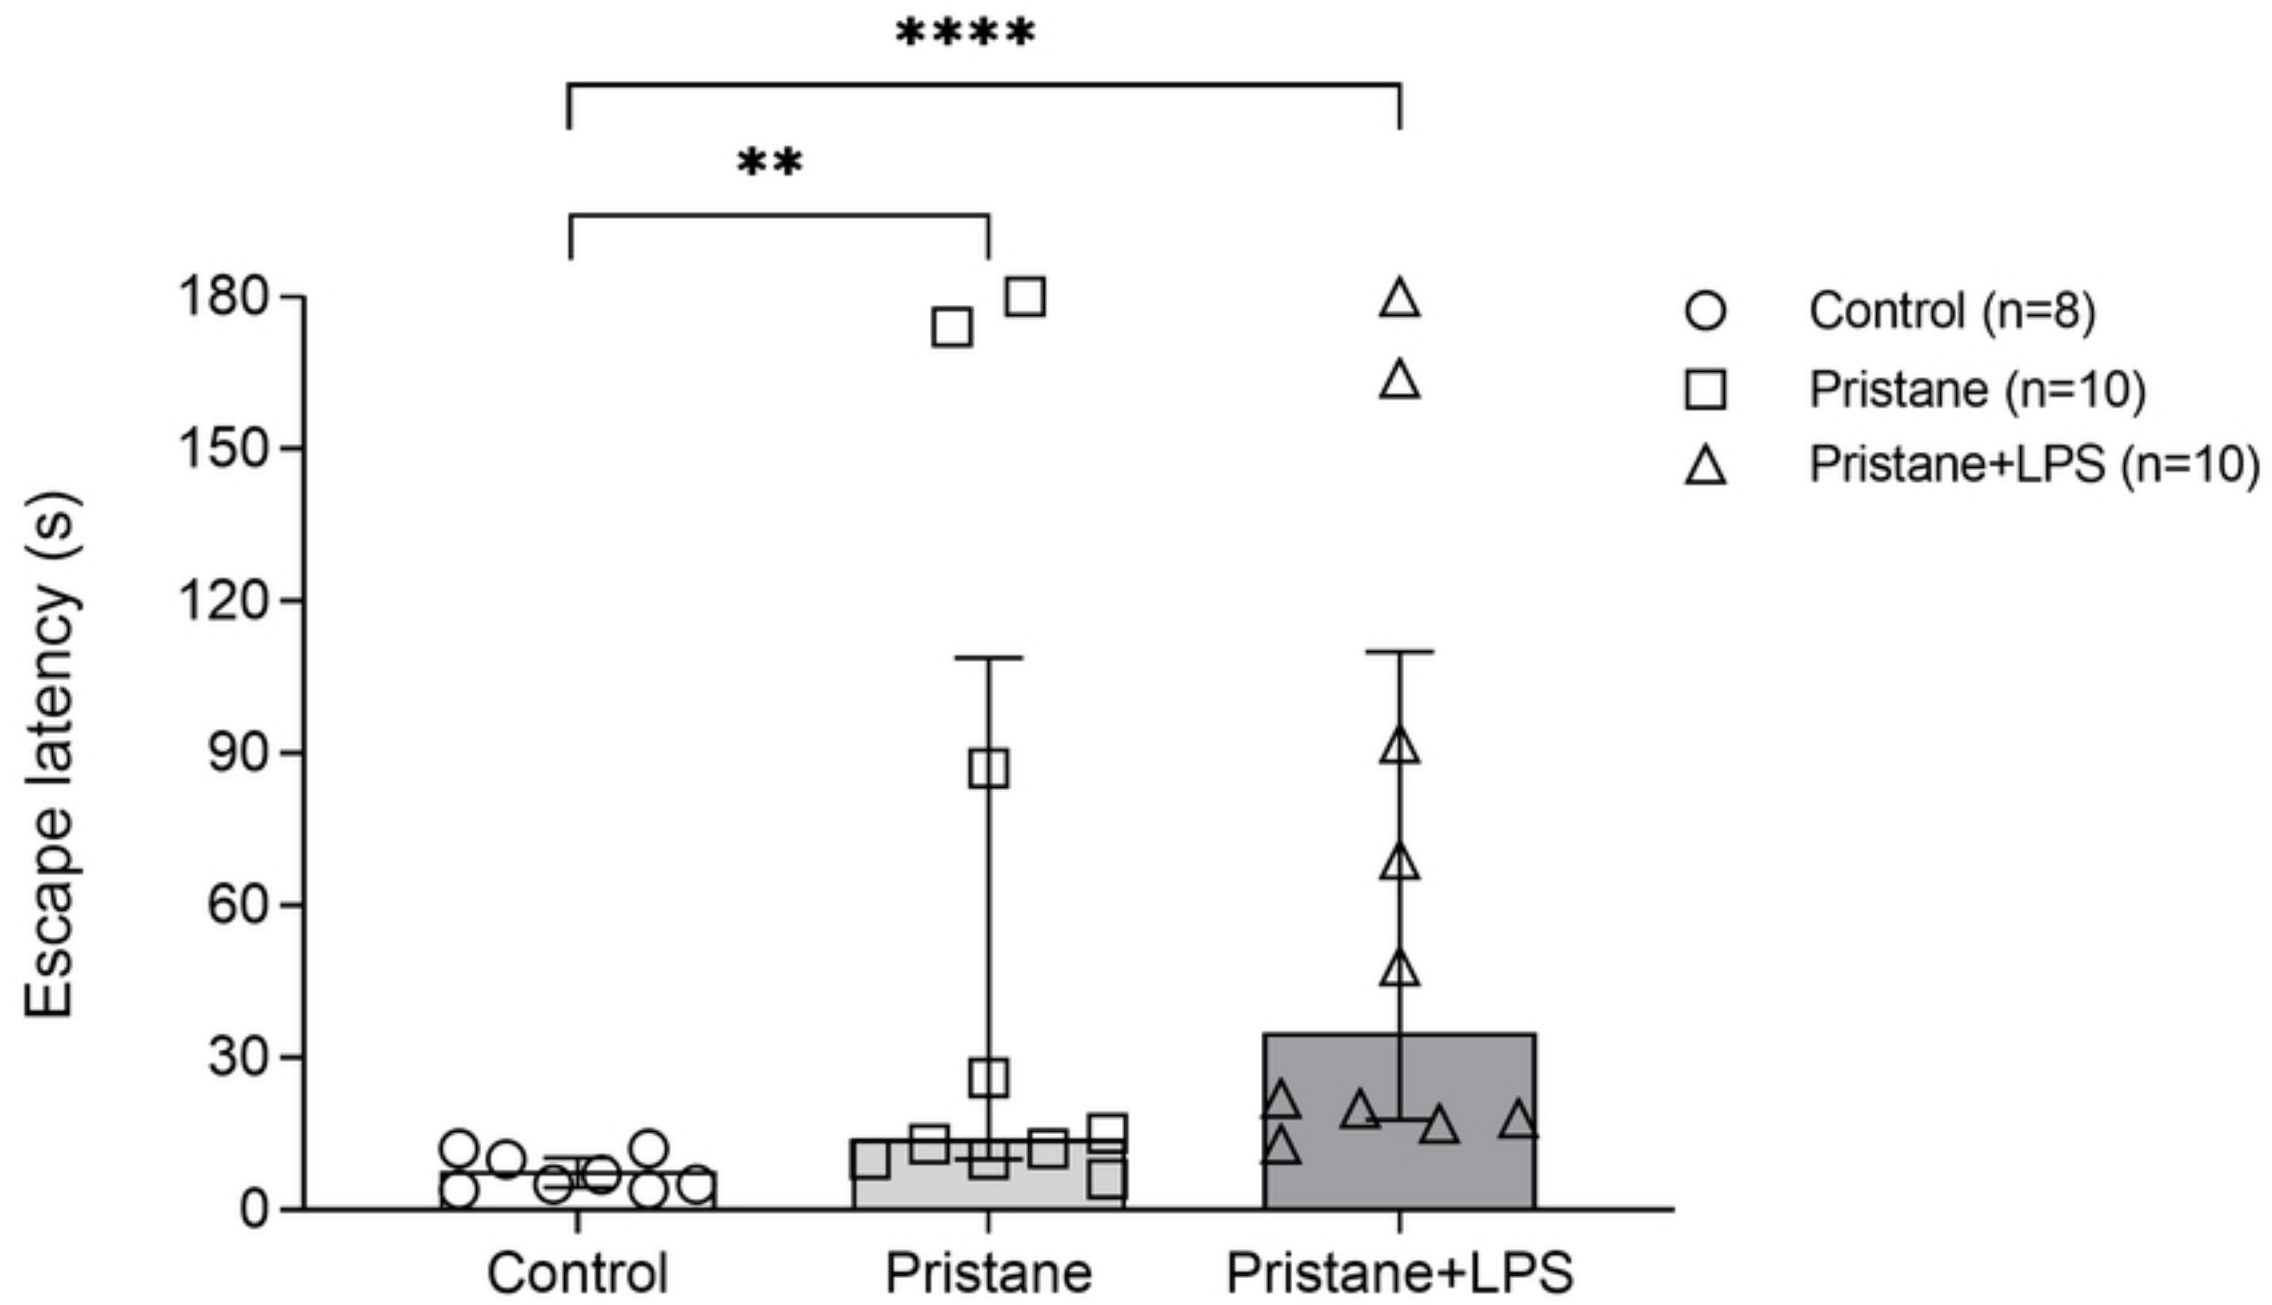

Fig 4

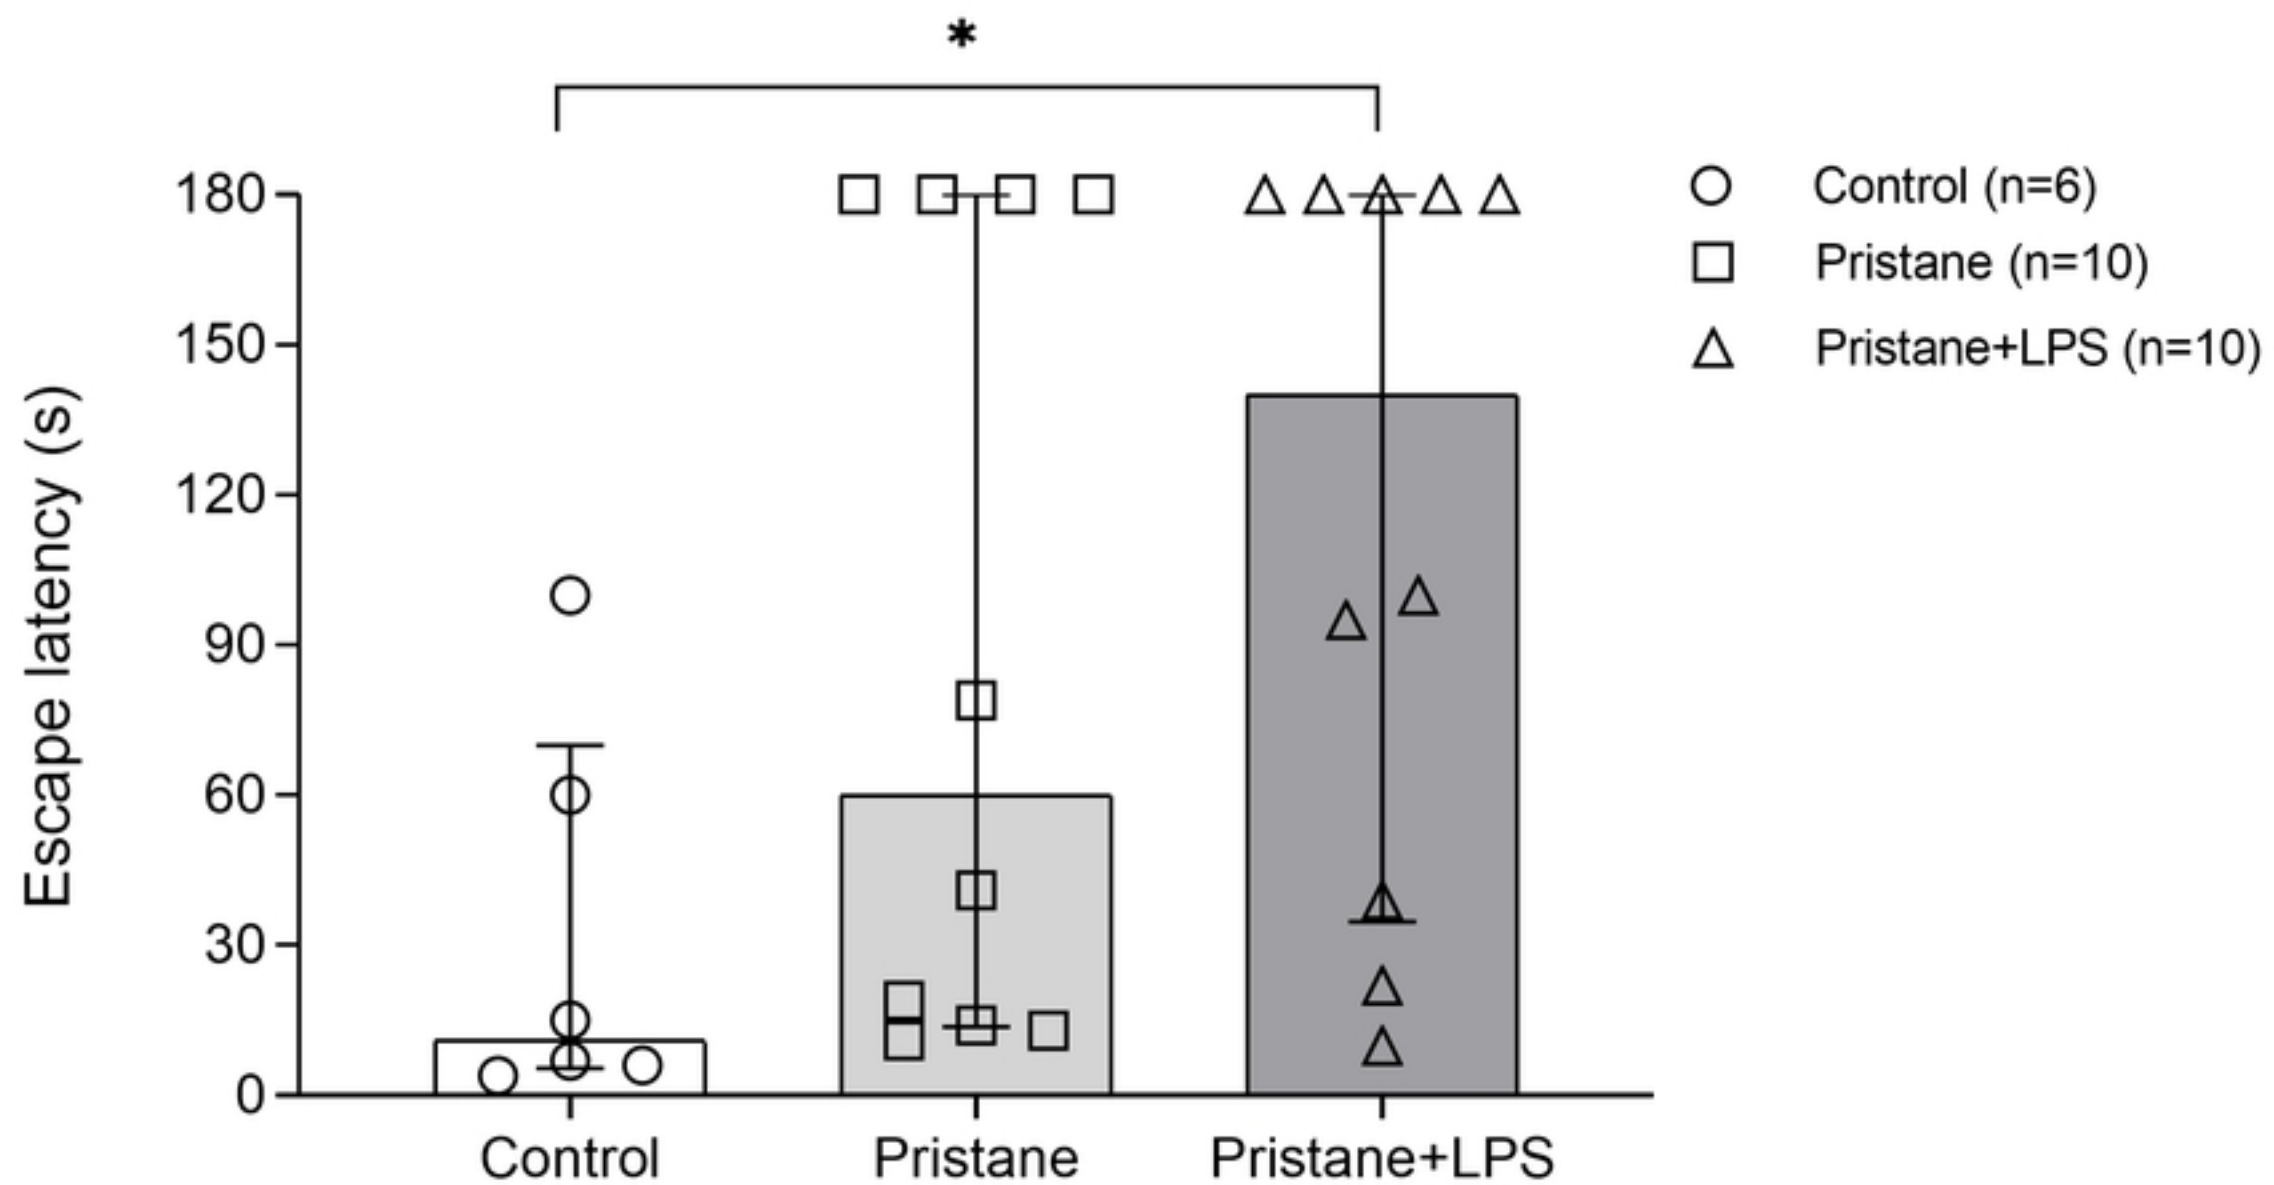

Fig 5



A)

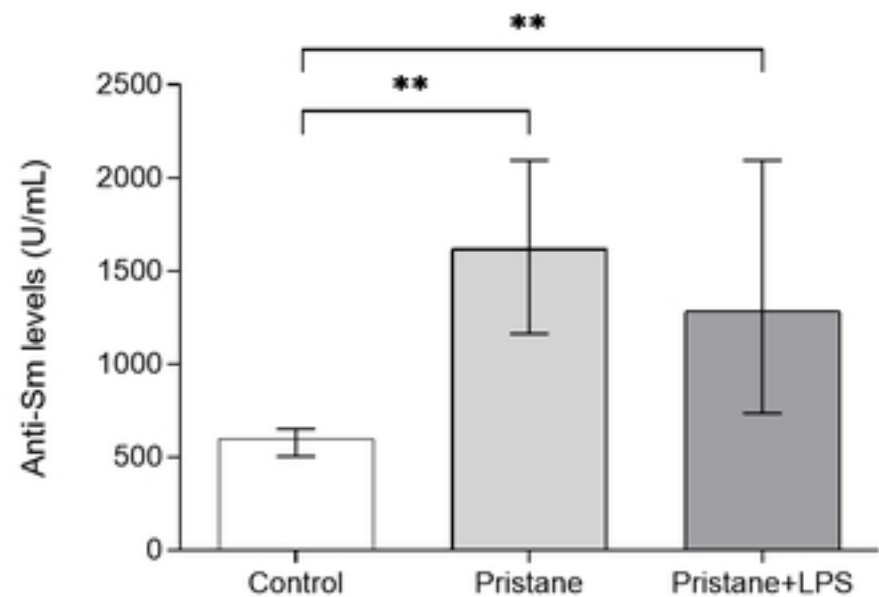

B)

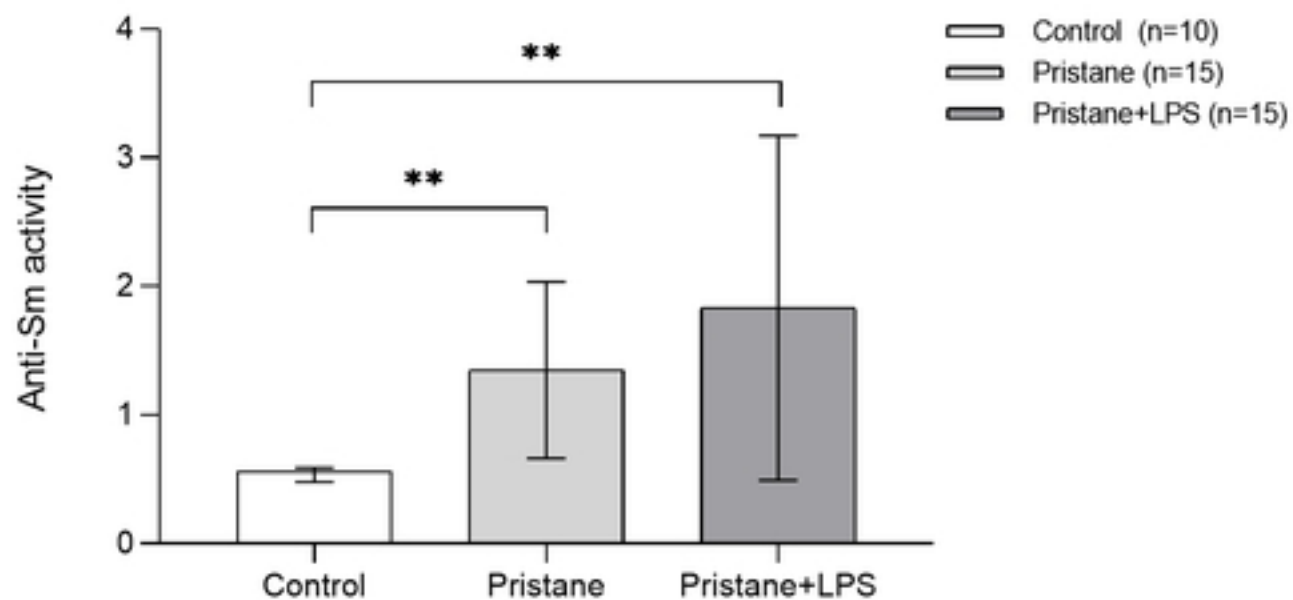

Fig 6

A)

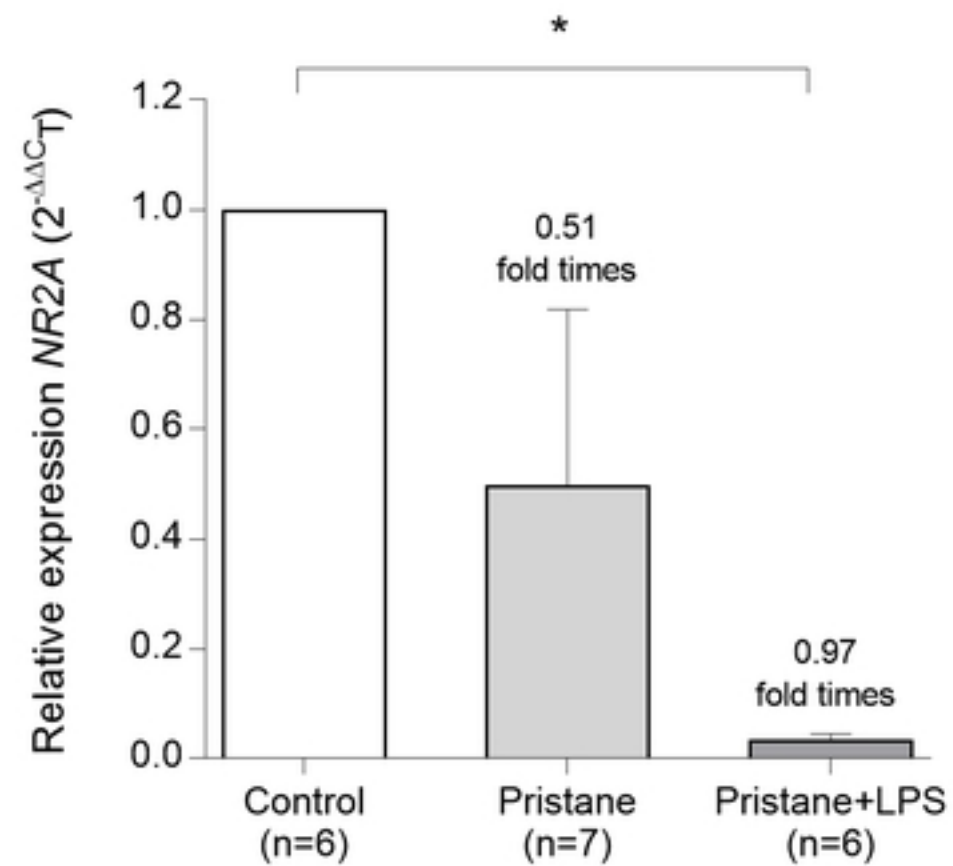

B)

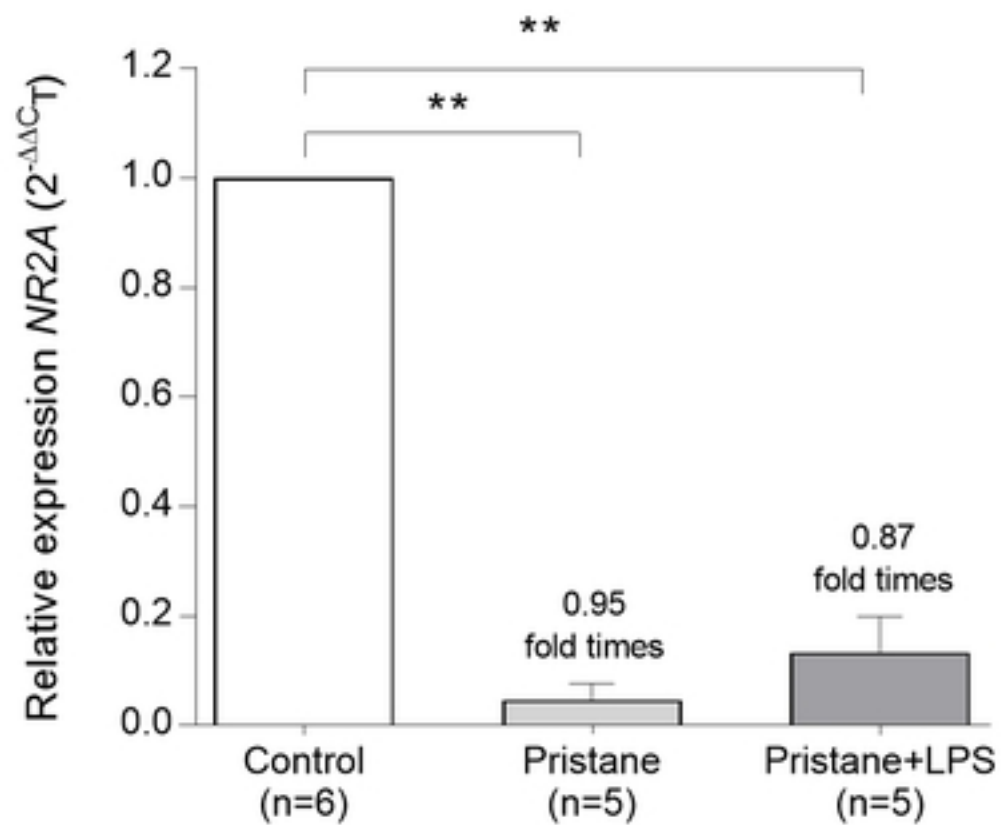

Fig 7

A)

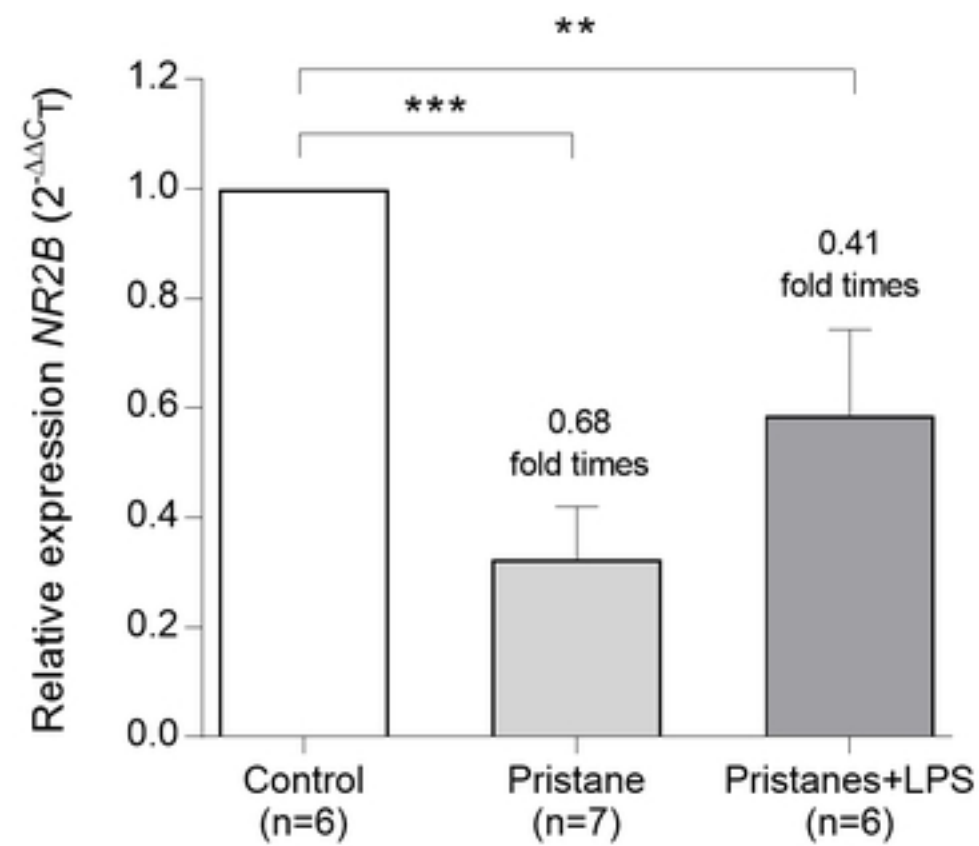

B)

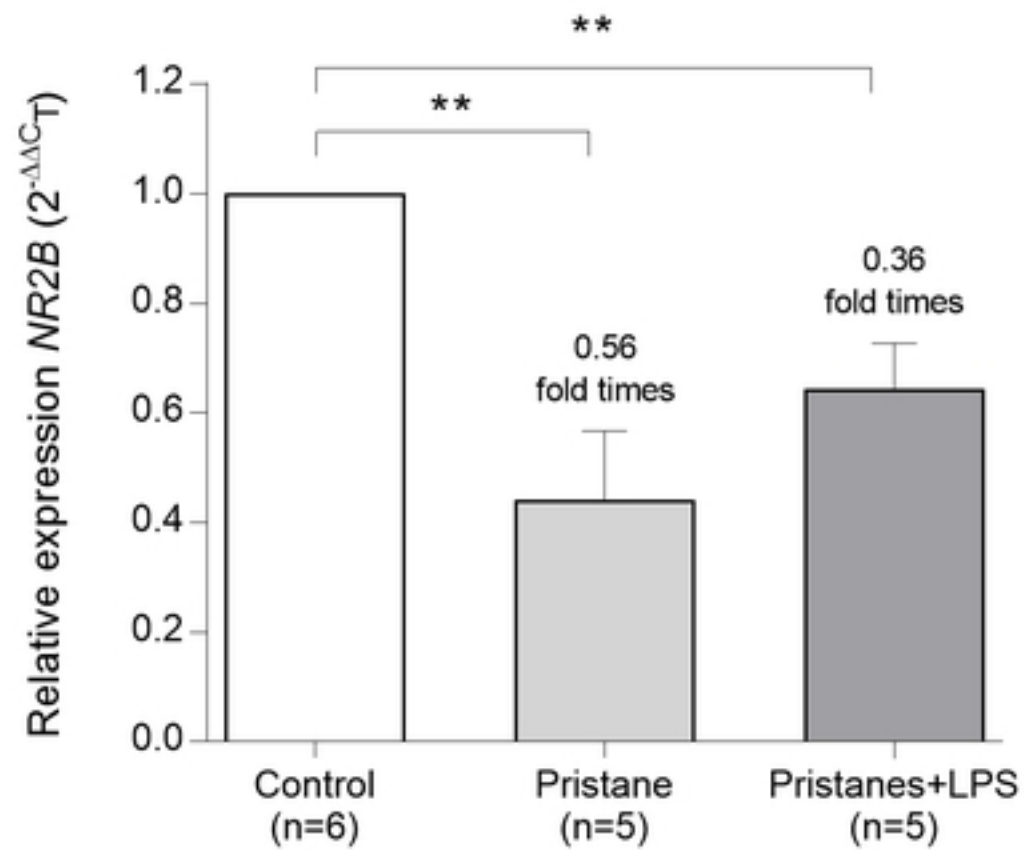

Fig 8

A)

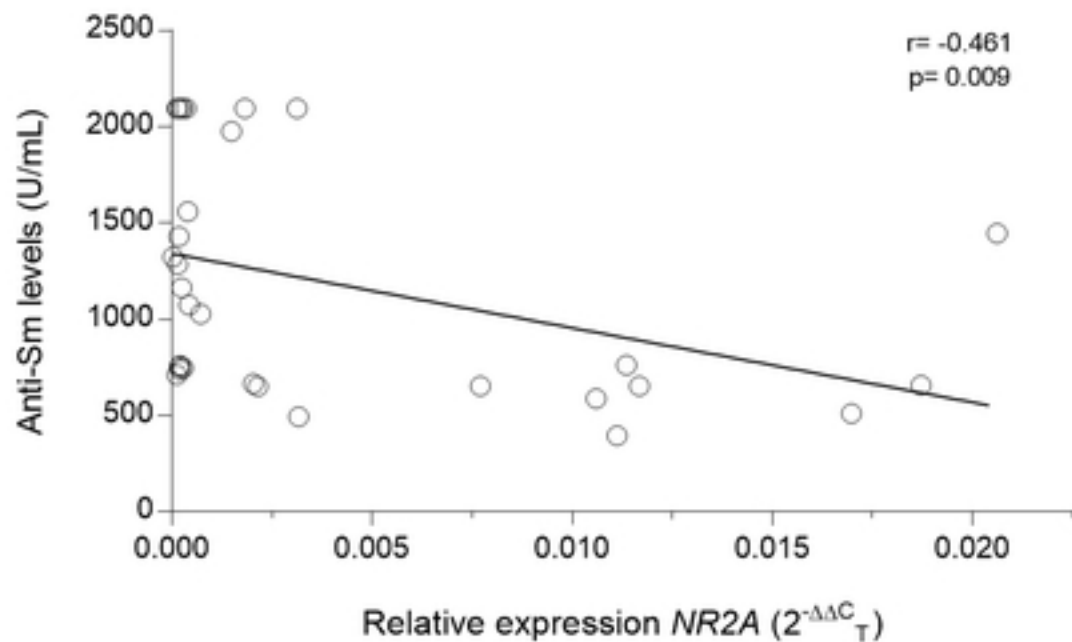

B)

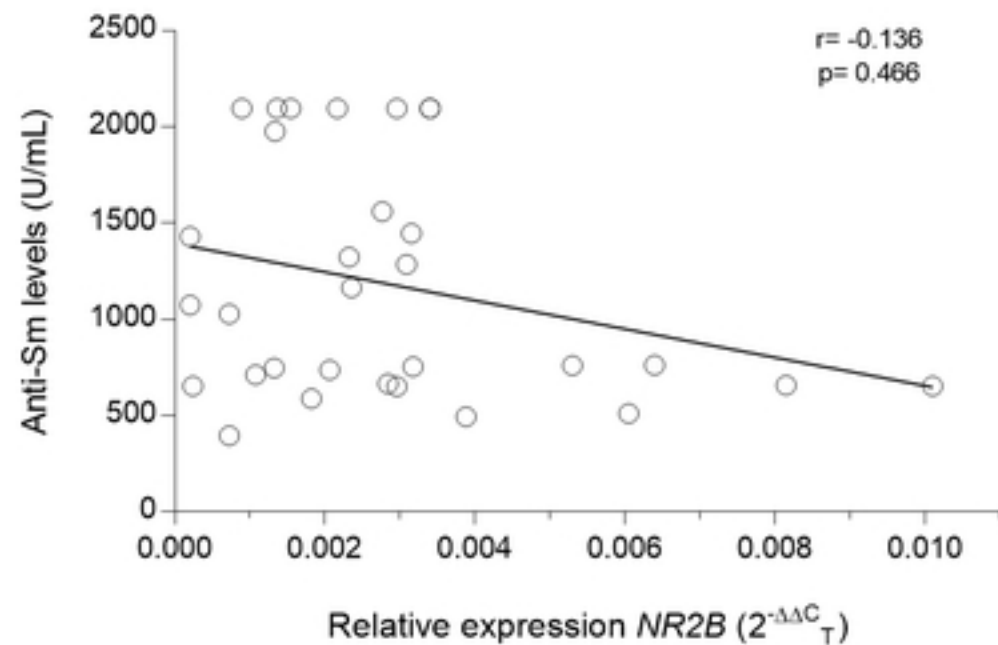

Fig 9
